# Supplementary material
Source: publisher figshare collection journal article supplement (https://gsajournals.figshare.com/articles/dataset/_/6913253)
Supplement: Supplementary file 1 [file 1]

## Supplementary Materials

Santantonio, N., Jannink, J., Sorrells, M. 2019. Homeologous epistasis in wheat: The search for an immortal hybrid. *Genetics*

**Table S1** ANOVA table for *Rht-1B* and *Rht-1D* linked GBS markers and their epistatic interaction for plant height (cm) in 158 RIL lines derived from NY91017-8080 × Caledonia.

| Source            | df  | SS    | MS   | F value | $-\log_{10}(\text{p-value})$ |
|-------------------|-----|-------|------|---------|------------------------------|
| SNP36427          | 1   | 7065  | 7065 | 53.5    | 10.9                         |
| SNP11172          | 1   | 7391  | 7391 | 56.0    | 11.3                         |
| SNP36427:SNP11172 | 1   | 1243  | 1243 | 9.4     | 2.6                          |
| Residuals         | 154 | 20323 | 132  |         |                              |

**Table S2** Table of genotype frequencies for the ‘perfect’ *Rht-1* markers in the CNLM population. The + and – signs indicate the wildtype and mutant alleles, respectively. The margins indicate the marker allele frequencies.

|                                | KASP_RhtD1 <sup>–</sup> | KASP_RhtD1 <sup>+</sup> |             |
|--------------------------------|-------------------------|-------------------------|-------------|
| KASP_cimRhtB1_snp <sup>–</sup> | 0.008                   | 0.093                   | 0.101       |
| KASP_cimRhtB1_snp <sup>+</sup> | 0.721                   | 0.178                   | 0.899       |
|                                | 0.729                   | 0.271                   | $D' = 0.89$ |

**Table S3** Estimates of  $s$  coefficients for marker sets where both additive and the two-way interaction effects were significant at  $p < 0.05$  for each of 4 traits. The expected number of non-zero additive and two-way interactions effects based on a 0.05 significance threshold by chance for each trait is 3 (i.e. 22,411 two-way interactions  $\times$  0.05<sup>3</sup>). Coefficients have been grouped by categories related to the potential mode of epistasis, where  $s < 0.5$  indicates a highly negative interaction,  $0.5 \leq s < 1$  a less-than-additive interaction may be indicative of subfunctionalization for homeologous genes, and  $s > 1$  which indicates positive, or greater-than-additive, epistasis. Three marker sets are shown, either across all homeologous loci (Homeo), sampled sets within (Within) and across (Across) non-syntenic subgenome regions. An additional phenotype was simulated to contain additive only phenotypes to contain no epistasis, and fit with the Homeo marker set (Simulated Additive).

| Marker Set         | Trait | $s < 0.5$ | $0.5 \leq s < 1$ | $s > 1$ | Total <sup>a</sup> |
|--------------------|-------|-----------|------------------|---------|--------------------|
| Homeo              | GY    | 0         | 0                | 2       | 2                  |
| Homeo              | PH    | 2         | 8                | 4       | 14***              |
| Homeo              | TW    | 5         | 4                | 2       | 11**               |
| Homeo              | HD    | 1         | 2                | 0       | 3                  |
| Simulated Additive | PH    | 0         | 1                | 3       | 4                  |
| Simulated Additive | HD    | 1         | 0                | 1       | 2                  |
| Across             | GY    | 2         | 2                | 1       | 5                  |
| Across             | PH    | 3         | 0                | 0       | 3                  |
| Across             | TW    | 2         | 1                | 0       | 3                  |
| Across             | HD    | 2         | 4                | 0       | 6*                 |
| Within             | GY    | 1         | 1                | 0       | 2                  |
| Within             | PH    | 2         | 1                | 3       | 6*                 |
| Within             | TW    | 1         | 1                | 1       | 3                  |
| Within             | HD    | 2         | 0                | 0       | 2                  |

<sup>a</sup> \*, \*\*, \*\*\* indicate significantly greater than the expected number of significant sets at  $p = 0.05$ ,  $10^{-4}$  and  $10^{-6}$  based the binomial distribution with 22,411 trials and a probability of 0.05<sup>3</sup>.

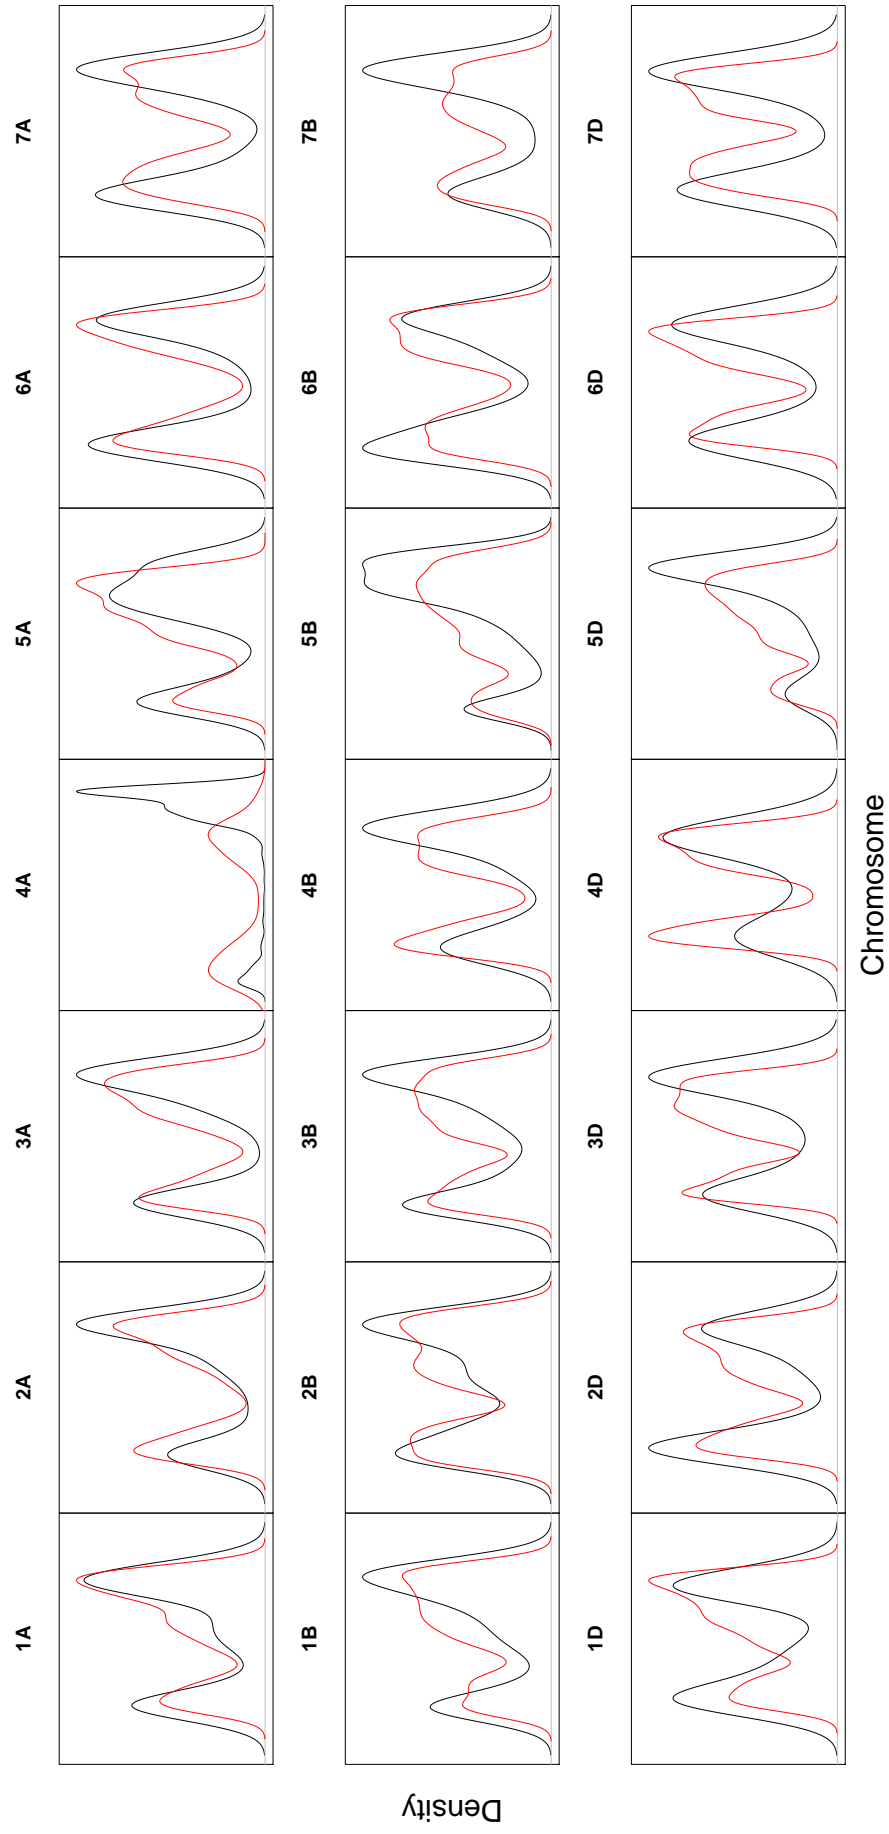

**Figure S1** Smoothed densities of GBS markers (black) and genes (red) along the 21 wheat chromosomes in the CNLM population.

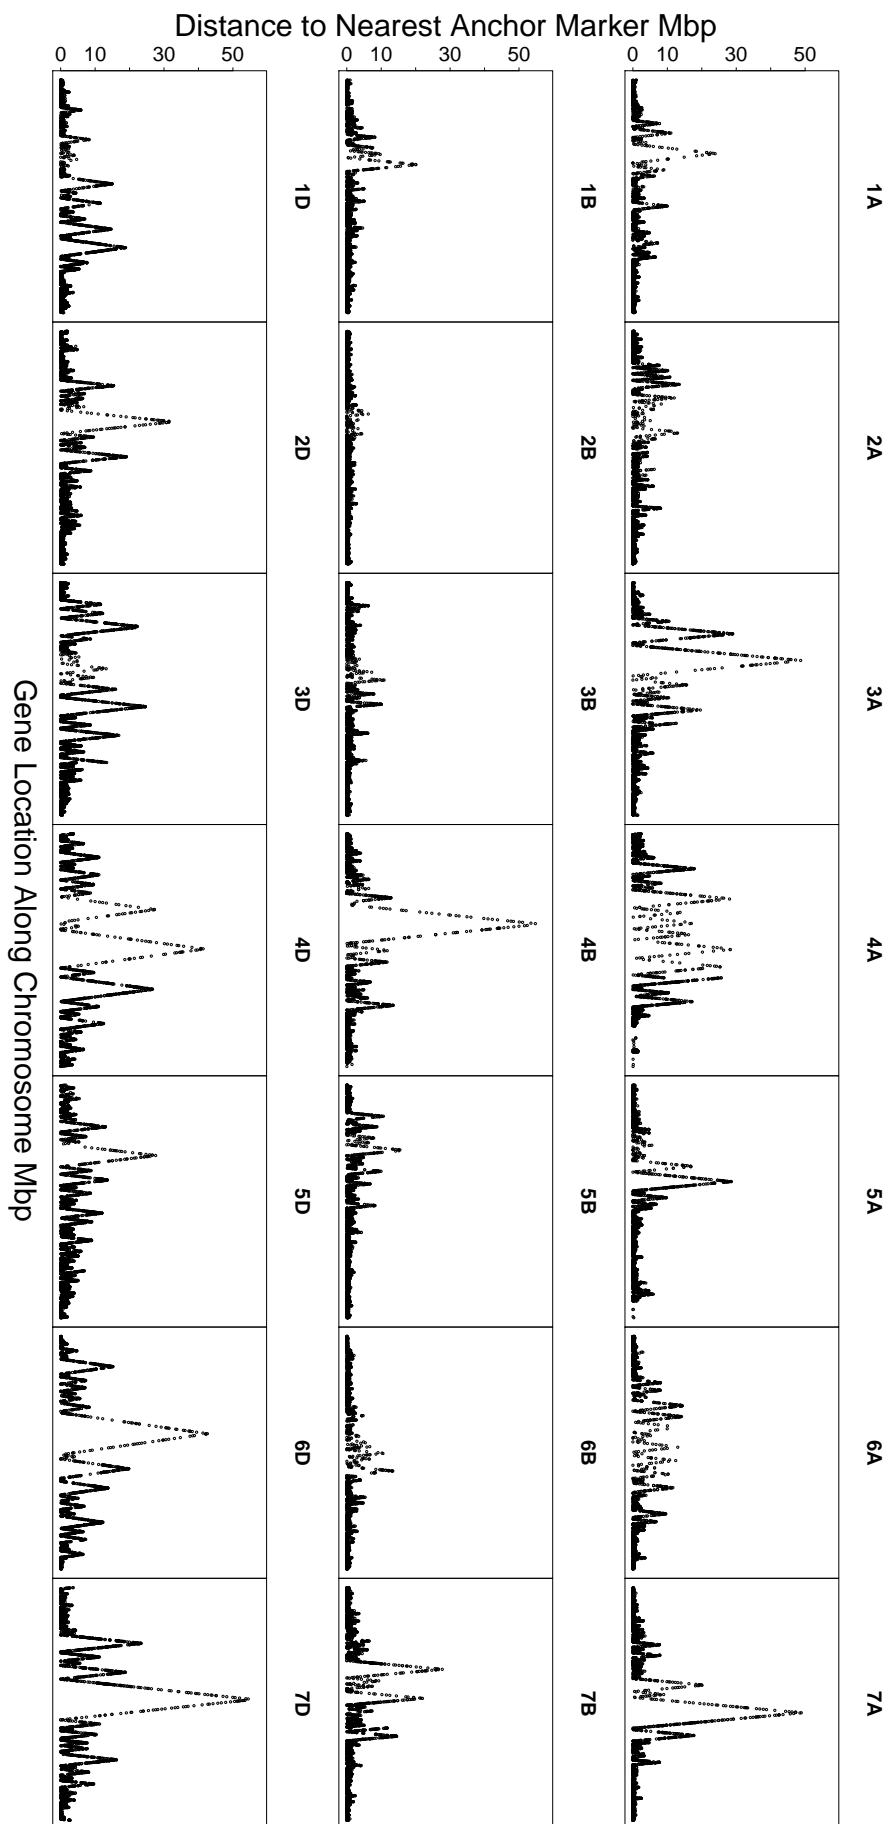

**Figure S2** Distance of genes from their nearest GBS anchor marker along the 21 wheat chromosomes in the CNLM population.

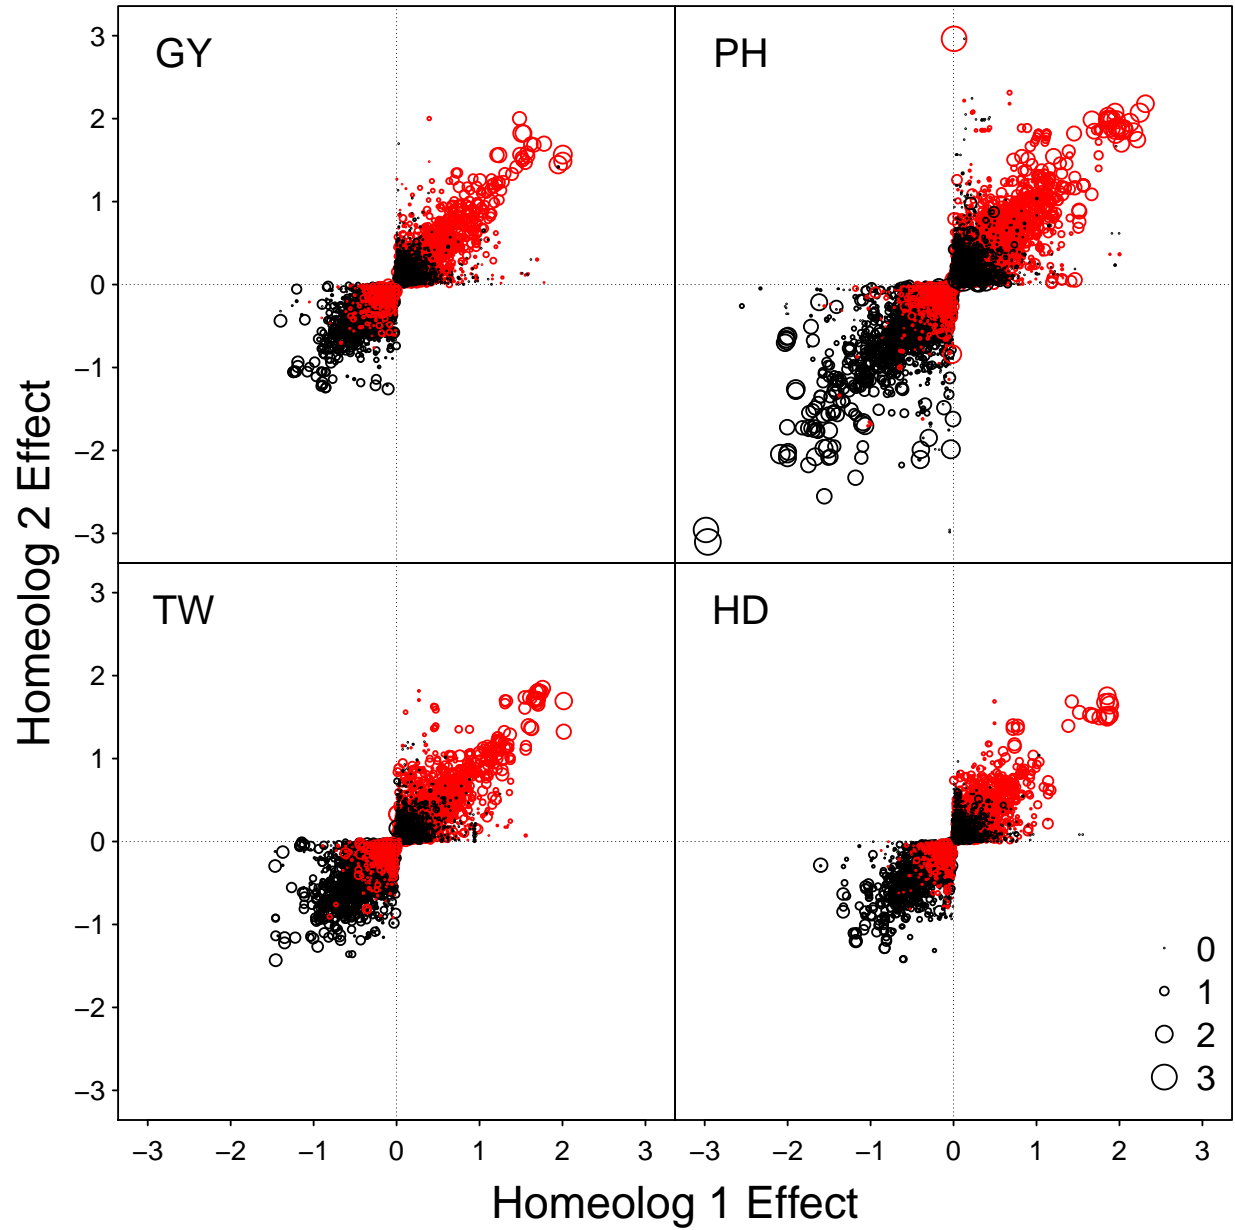

**Figure S3** LAVHAE oriented homeologous marker pair additive effects with point size representing the magnitude of the two-way homeologous interaction effect, and the color denoting the direction of that effect where black is positive and red is negative. Four simulated phenotypes sampled to obtain no epistatic interactions, GY, PH, TW and HD, are shown.

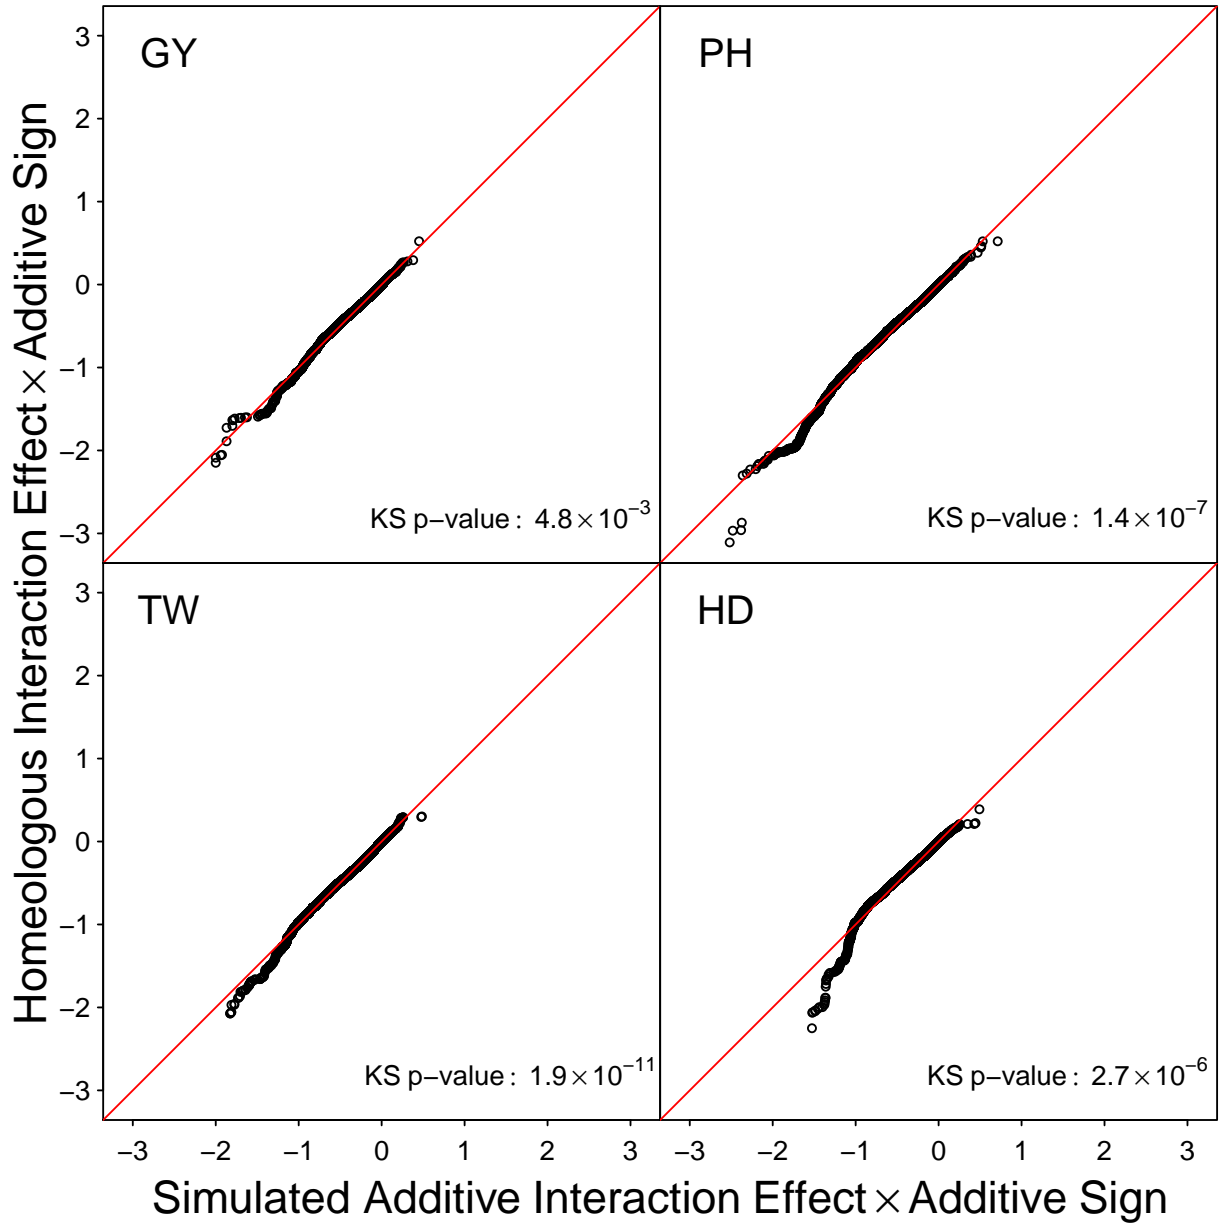

**Figure S4** Quantile quantile plot of the ordered estimated homeologous interaction effects plotted against those from a simulated phenotype sampled to obtain no epistatic interactions using the HTEV marker orientation. Interaction effects have been multiplied by the effect sign of the corresponding additive effects to emphasize the relationship between the additive and interaction effects.

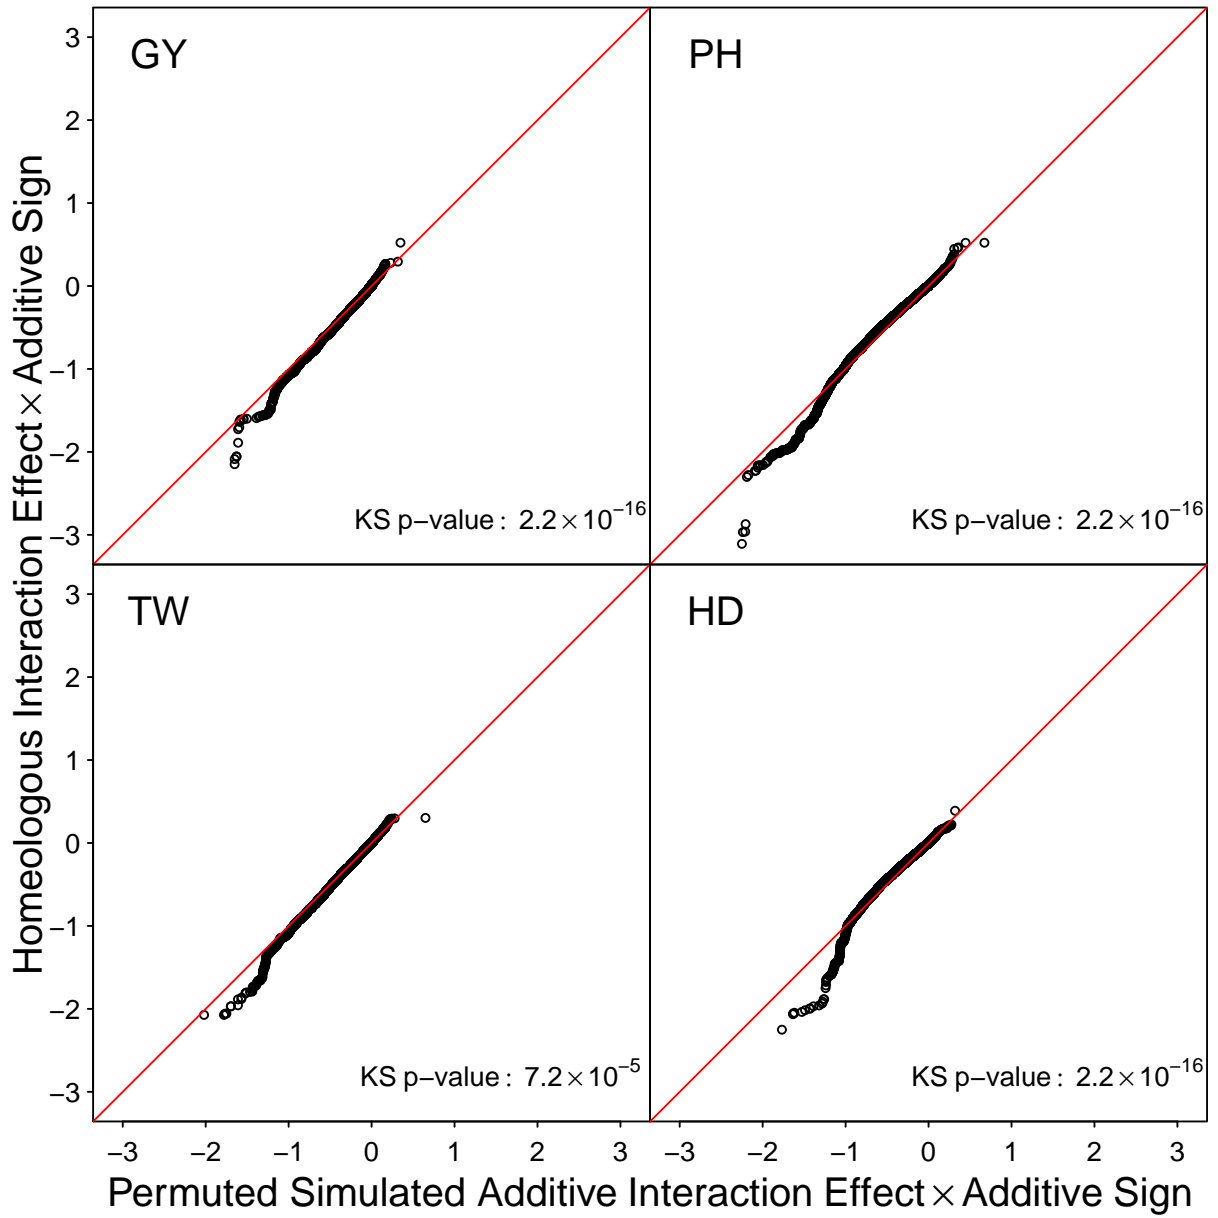

**Figure S5** Quantile quantile plot of the ordered estimated homeologous interaction effects plotted against those from a simulated phenotype sampled to obtain no epistatic interactions using the HTEV marker orientation. Markers scores were permuted before simulation of the phenotype to remove LD between markers. Interaction effects have been multiplied by the effect sign of the corresponding additive effects to emphasize the relationship between the additive and interaction effects.

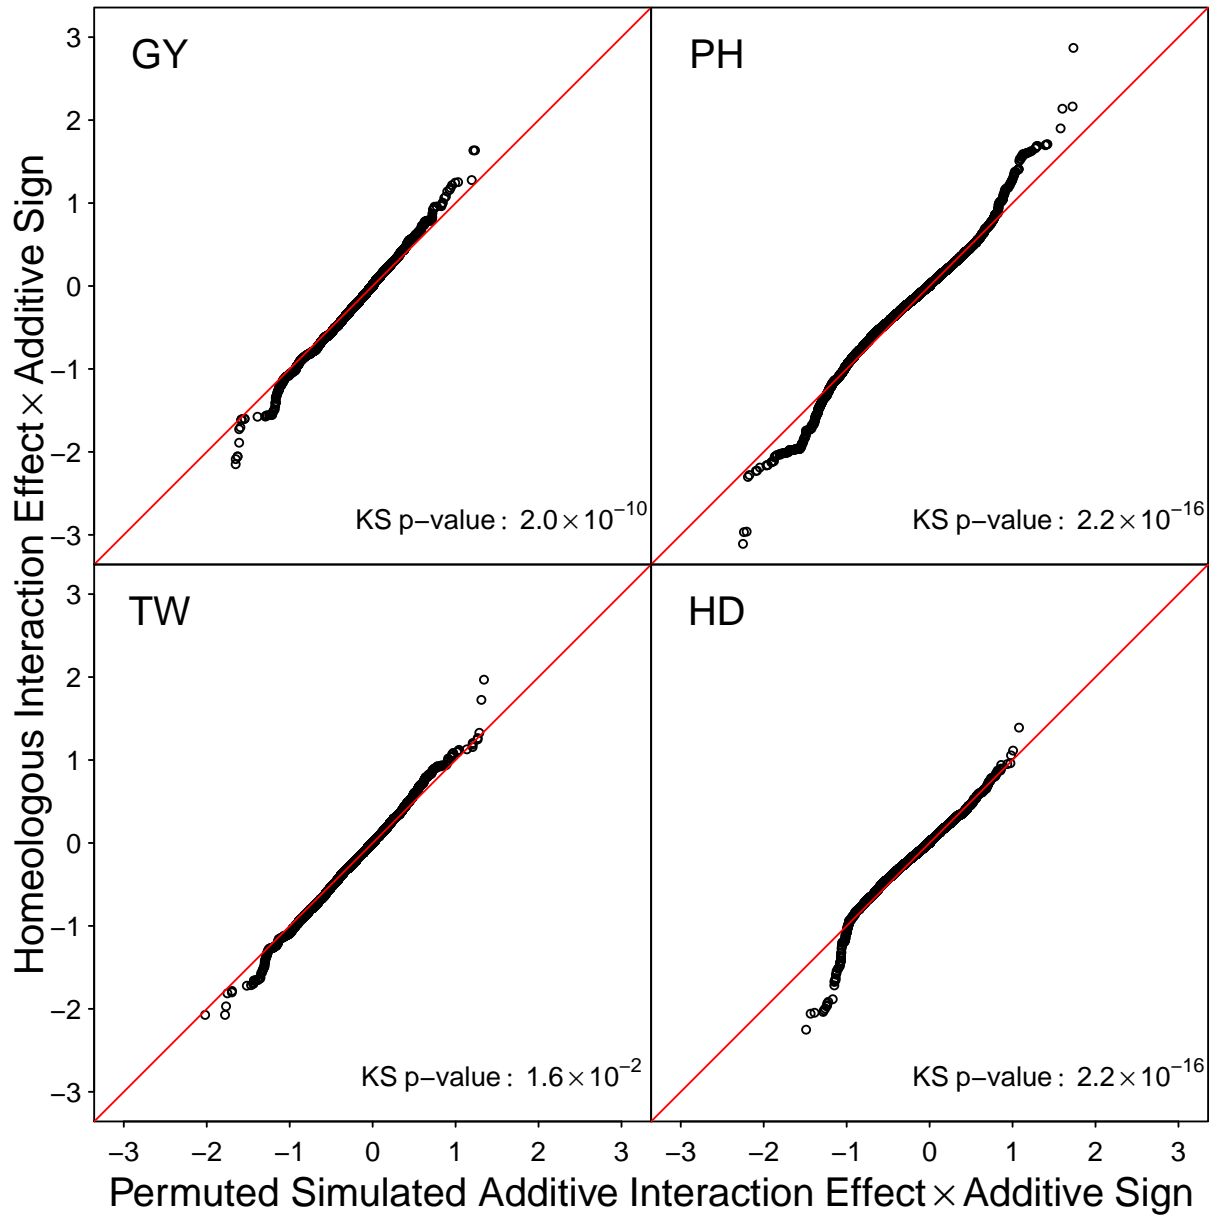

**Figure S6** Quantile quantile plot of the ordered estimated homeologous interaction effects plotted against those from a simulated phenotype sampled to obtain no epistatic interactions using the LAVHAE marker orientation. Markers scores were permuted before simulation of the phenotype to remove LD between markers. Interaction effects have been multiplied by the effect sign of the corresponding additive effects to emphasize the relationship between the additive and interaction effects.



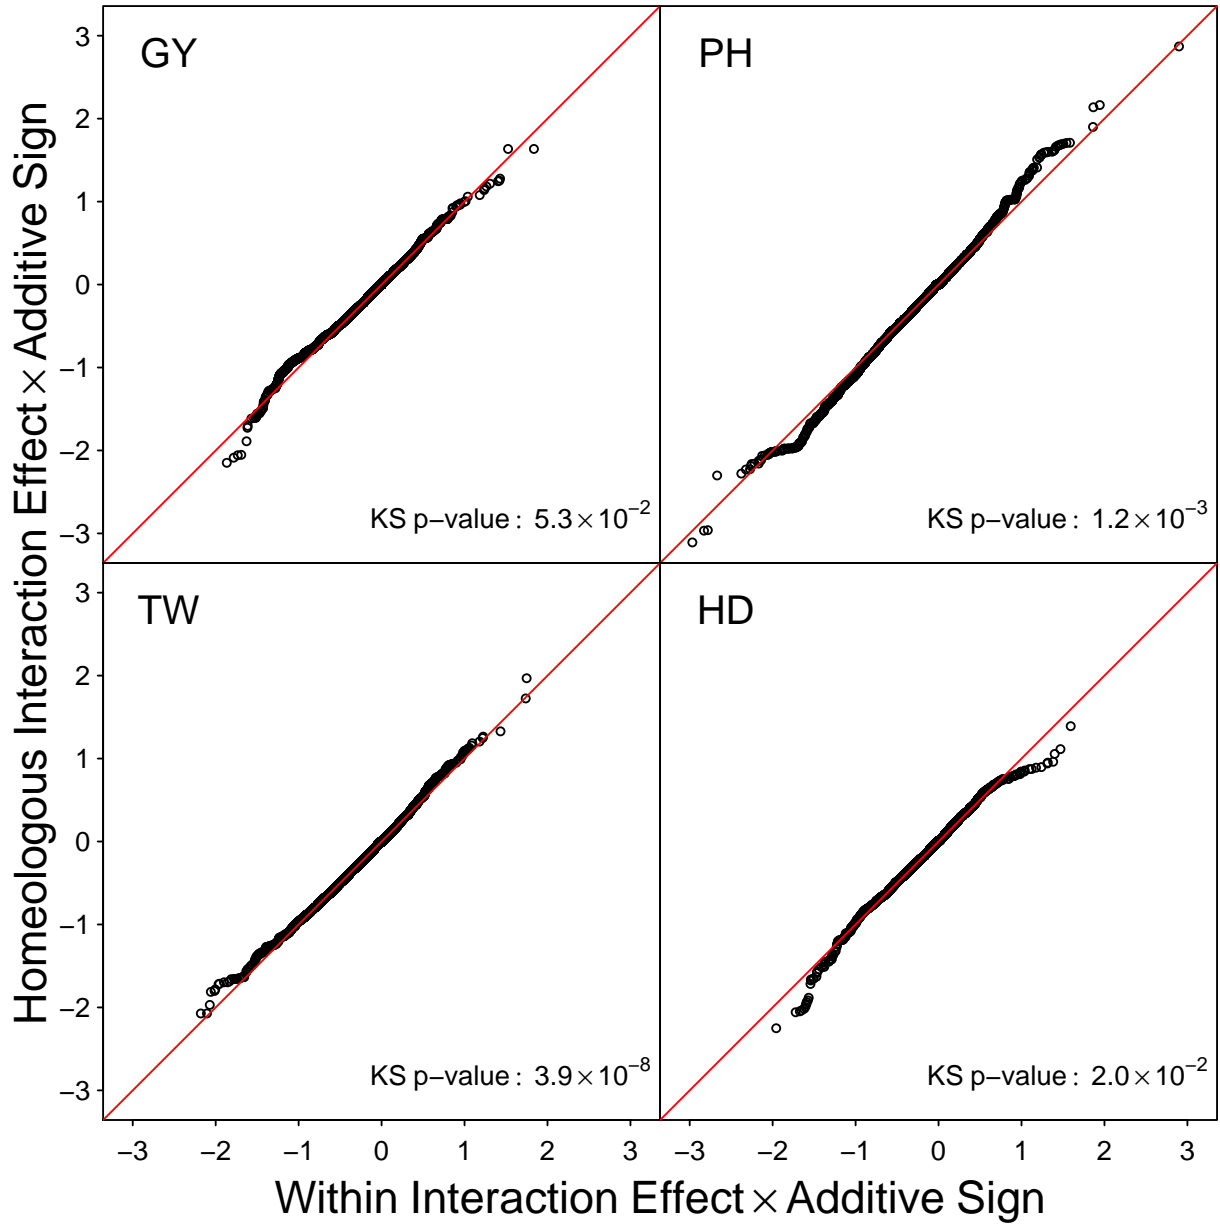

**Figure S7** Quantile quantile plot of the ordered estimated homeologous interaction effects plotted against those from marker sets sampled within subgenome chromosomes (Within) using the LAVHAE . Interaction effects have been multiplied by the effect sign of the corresponding additive effects to emphasize the relationship between the additive and interaction effects.

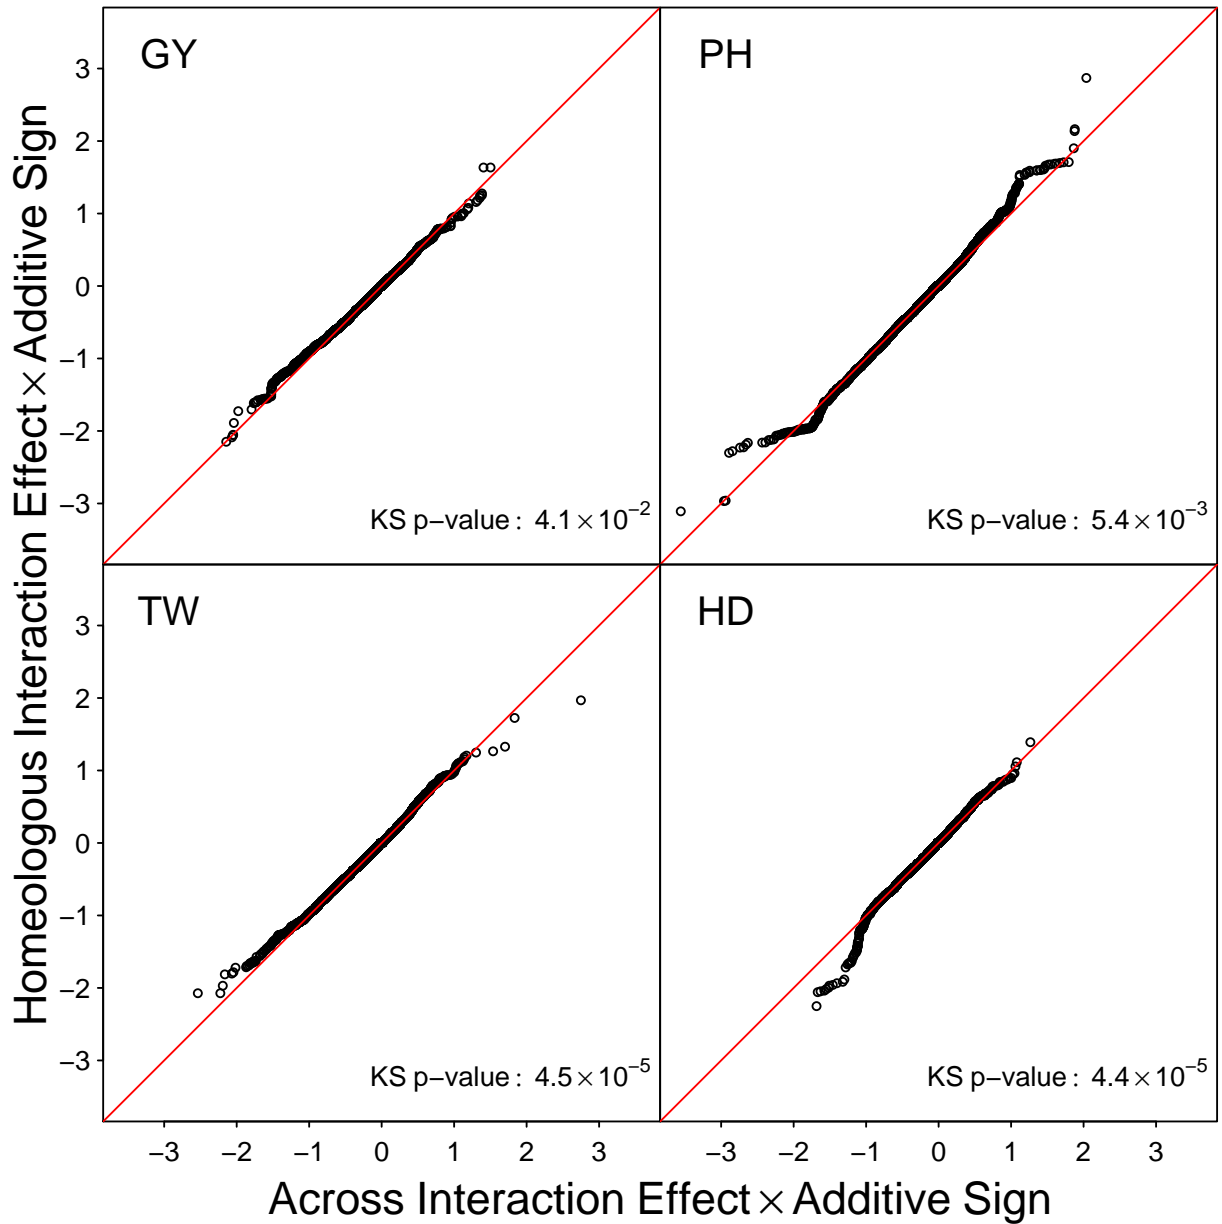

**Figure S8** Quantile quantile plot of the ordered estimated homeologous interaction effects plotted against those from marker sets sampled across non-syntenic subgenome chromosomes (Across) using the LAVHAE marker orientation. Interaction effects have been multiplied by the effect sign of the corresponding additive effects to emphasize the relationship between the additive and interaction effects.

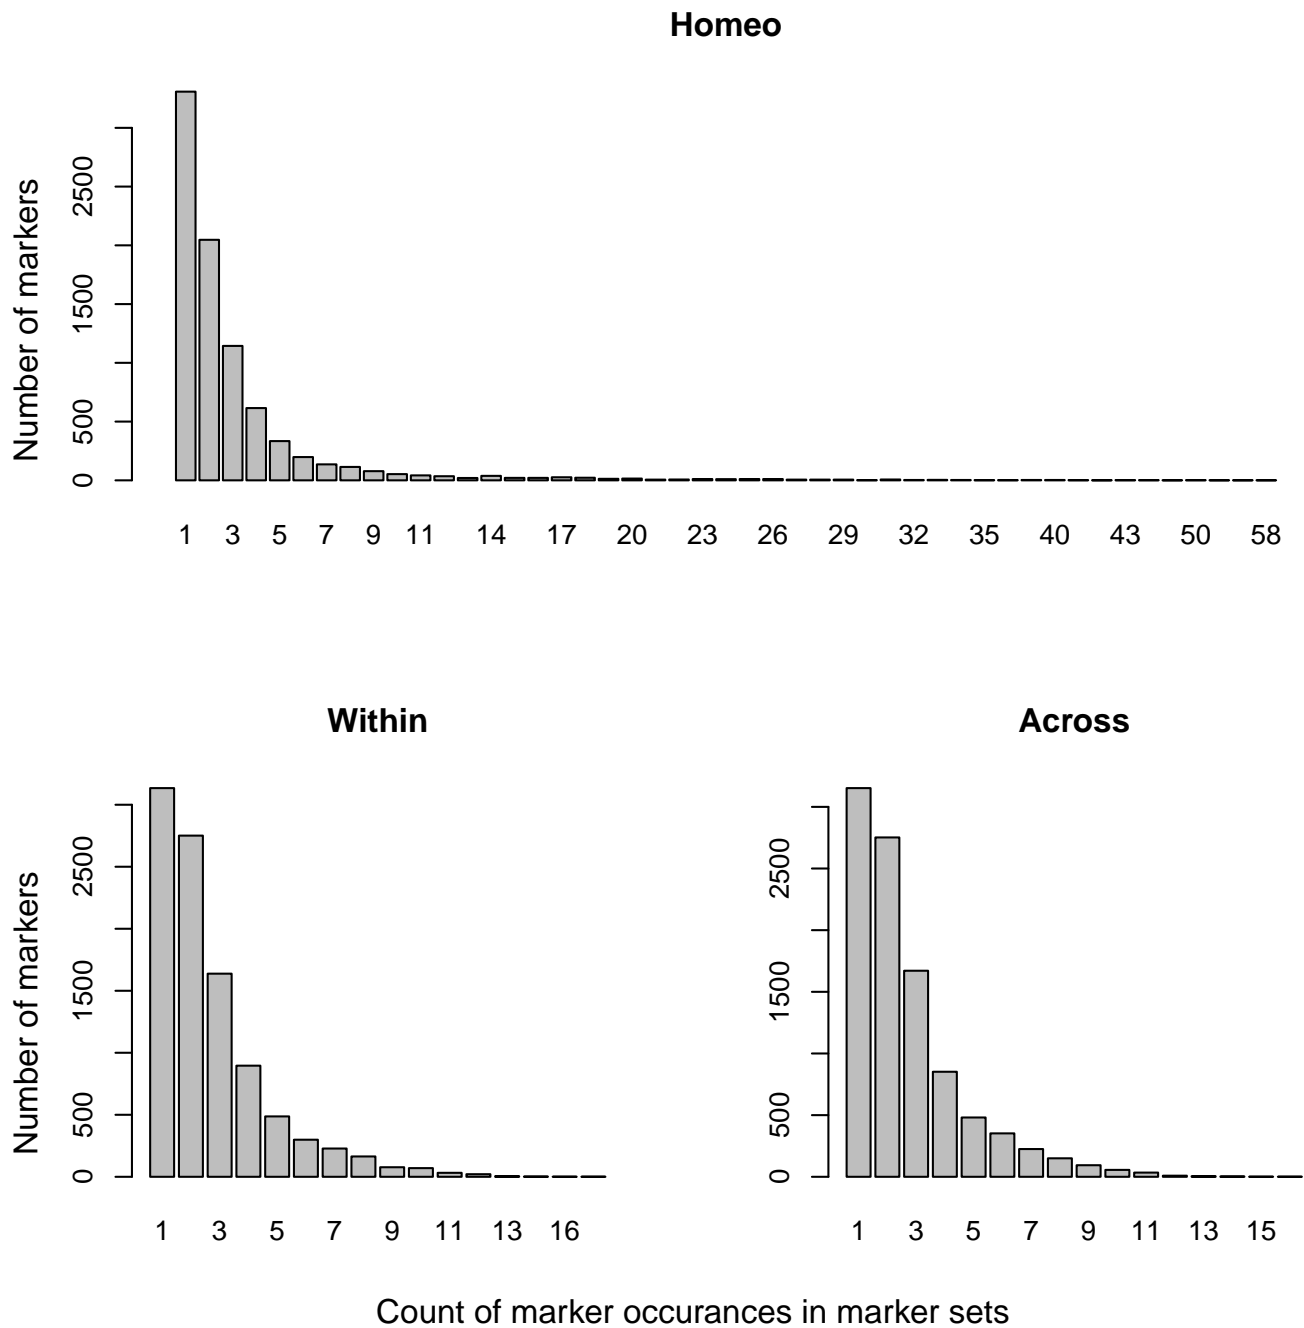

**Figure S9** Distribution of the number of marker occurrences in marker sets. An occurrence of 1 indicates that a marker was only included in one marker set, whereas an occurrence of 10 would indicate that the marker was included in 10 marker sets.

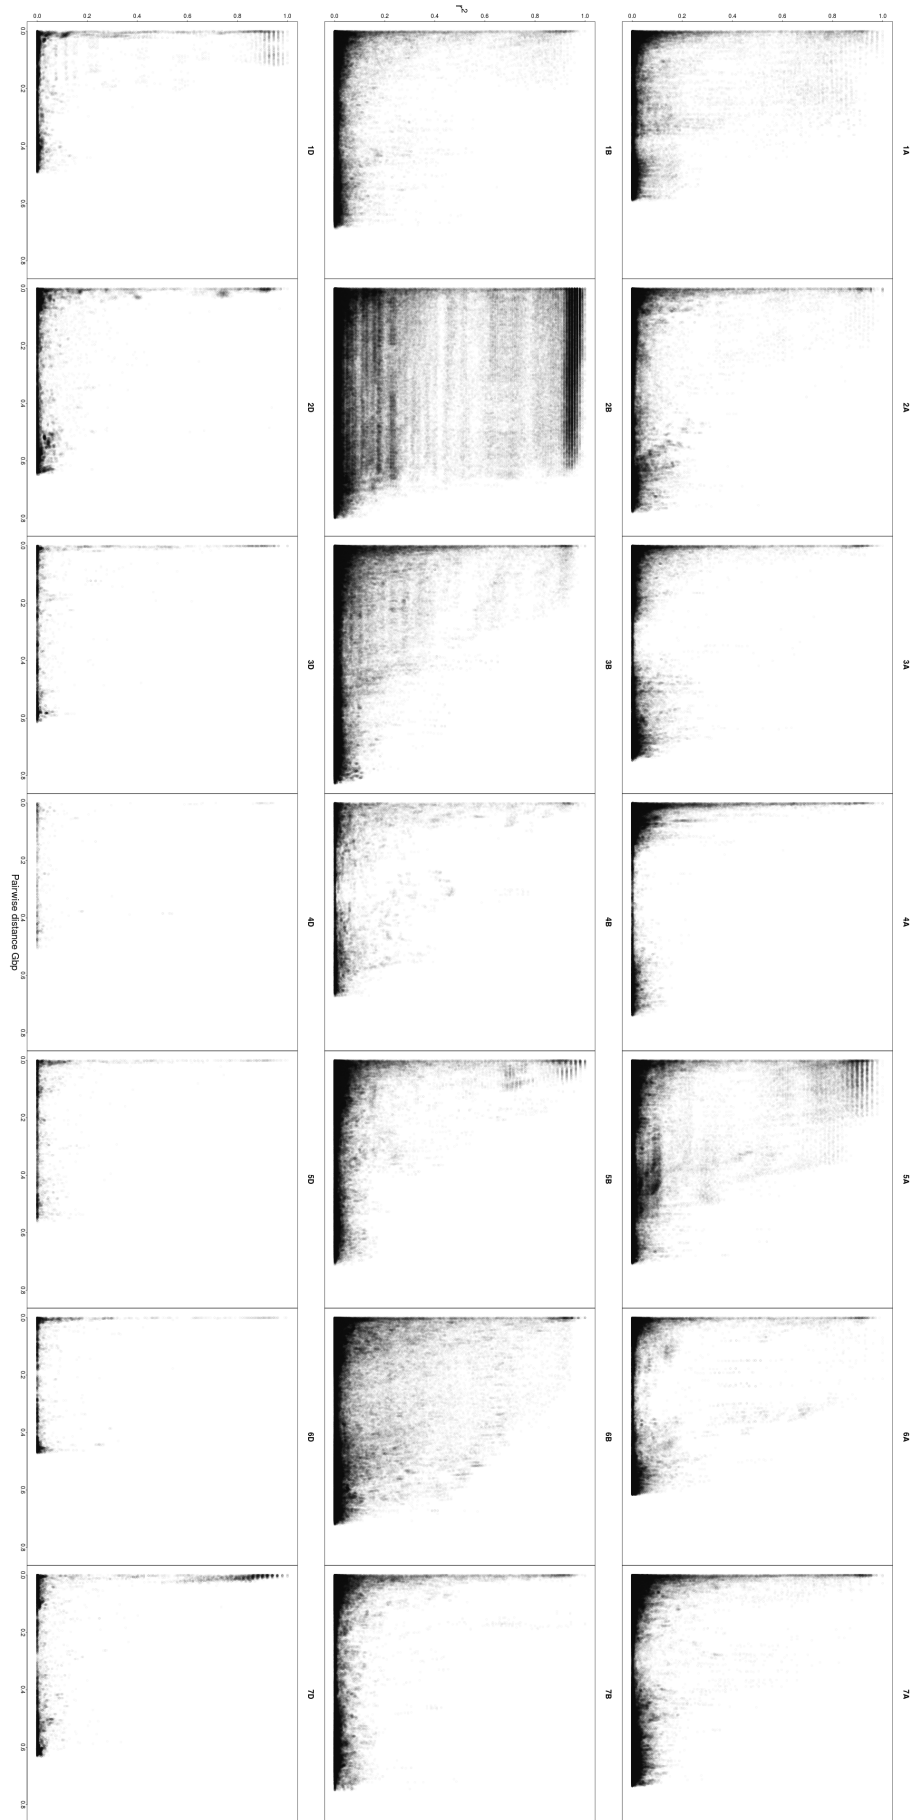

**Figure S10** Pairwise linkage disequilibrium  $r^2$  values for the 21 wheat chromosomes in the CNLM population.

**Table S4** Mixed model REML fit summaries of one additive and four epistasis models for four traits (GY, PH, TW and HD) in the CNLM population based on the  $\{-1, 1\}$  marker parameterization using the LAVHAE marker orientation. Plot level heritabilities assuming genotype independence (i.i.d.) for each trait are shown underneath each trait name.

| Trait                |                   | Additive                                | Pairwise      | Homeo                        | Within                        | Across                        |
|----------------------|-------------------|-----------------------------------------|---------------|------------------------------|-------------------------------|-------------------------------|
| GY<br>$h^2 = 0.30^a$ | $\log\mathcal{L}$ | -48                                     | -43           | -42                          | -26                           | -23                           |
|                      | parameters        | 28                                      | 29            | 29                           | 29                            | 29                            |
|                      | AIC               | 153                                     | 144           | 141                          | 110                           | 104                           |
|                      | G                 | 0.268 <sup>b</sup> (12.59) <sup>c</sup> | 0.203 (7.86)  | 0.204 (8.49)                 | 0.133 (5.93)                  | 0.13 (5.84)                   |
|                      | H                 |                                         | 0.018 (3.04)  | 0.046 (3.29) <sup>***d</sup> | 0.093 (5.64) <sup>****</sup>  | 0.093 (5.77) <sup>****</sup>  |
|                      | R                 | 0.324 (61.86) <sup>e</sup>              | 0.322 (61.39) | 0.323 (61.68)                | 0.321 (61.7)                  | 0.321 (61.7)                  |
| PH<br>$h^2 = 0.73$   | $\log\mathcal{L}$ | 2237                                    | 2360          | 2314                         | 2367                          | 2374                          |
|                      | parameters        | 26                                      | 27            | 27                           | 27                            | 27                            |
|                      | AIC               | -4423                                   | -4665         | -4574                        | -4680                         | -4694                         |
|                      | G                 | 3.823 (20.75)                           | 0.889 (6.46)  | 1.882 (11.66)                | 0.986 (7.35)                  | 1.046 (7.81)                  |
|                      | H                 |                                         | 0.478 (11.95) | 0.914 (8.72) <sup>****</sup> | 1.277 (11.67) <sup>****</sup> | 1.253 (11.62) <sup>****</sup> |
|                      | R                 | 0.135 (56.17)                           | 0.132 (56.5)  | 0.133 (56.34)                | 0.133 (56.45)                 | 0.133 (56.5)                  |
| TW<br>$h^2 = 0.79$   | $\log\mathcal{L}$ | 1547                                    | 1630          | 1608                         | 1641                          | 1632                          |
|                      | parameters        | 28                                      | 29            | 29                           | 29                            | 29                            |
|                      | AIC               | -3037                                   | -3203         | -3159                        | -3224                         | -3205                         |
|                      | G                 | 1.067 (16.66)                           | 0.194 (4.47)  | 0.442 (8.35)                 | 0.212 (4.81)                  | 0.221 (4.79)                  |
|                      | H                 |                                         | 0.184 (11.33) | 0.346 (8.39) <sup>****</sup> | 0.473 (10.95) <sup>****</sup> | 0.473 (10.66) <sup>****</sup> |
|                      | R                 | 0.2 (60.12)                             | 0.195 (60.25) | 0.198 (60.24)                | 0.197 (60.35)                 | 0.197 (60.31)                 |
| HD<br>$h^2 = 0.53$   | $\log\mathcal{L}$ | 6343                                    | 6432          | 6404                         | 6425                          | 6444                          |
|                      | parameters        | 27                                      | 28            | 28                           | 28                            | 28                            |
|                      | AIC               | -12631                                  | -12808        | -12751                       | -12794                        | -12831                        |
|                      | G                 | 3.9 (21.16)                             | 1.121 (7.3)   | 2.019 (12.03)                | 1.483 (9.25)                  | 1.212 (8.29)                  |
|                      | H                 |                                         | 0.451 (11.13) | 0.857 (8.26) <sup>****</sup> | 1.091 (10.01) <sup>****</sup> | 1.202 (10.97) <sup>****</sup> |
|                      | R                 | 0.054 (58.76)                           | 0.053 (58.98) | 0.053 (58.88)                | 0.053 (58.93)                 | 0.053 (58.96)                 |

<sup>a</sup>  $h^2$  is the plot level trait heritability assuming genotype independence.

<sup>b</sup> Variance component estimates reported for additive main effects (G) and epistatic interactions (H) are the ratios of the actual variance component to the residual variance component for ease of comparison.

<sup>c</sup> The variance component divided by their respective standard errors are shown in parentheses.

<sup>d</sup> \*, \*\*, \*\*\*, \*\*\*\* denote p-values of  $p < 0.05$ ,  $p < 0.01$ ,  $p < 0.001$ ,  $p < 10^{-6}$ , respectively for the likelihood ratio test to determine if the epistatic variance component is zero.

<sup>e</sup> The residual variance components, R, are the actual estimates from the centered and scaled data (refer to [Santantonio et al. \(2018\)](#) for scaling coefficients).

**Table S5** Mixed model REML fit summaries of three epistasis models for 4 traits (GY, PH, TW and HD) in the CNLM population based on the {0, 1} marker parameterization using the LAVHAE marker orientation.

| Trait |                   | Homeo                                 | Within                       | Across                       |
|-------|-------------------|---------------------------------------|------------------------------|------------------------------|
| GY    | log $\mathcal{L}$ | -48                                   | -47                          | -42                          |
|       | parameters        | 29                                    | 29                           | 29                           |
|       | AIC               | 155                                   | 152                          | 143                          |
|       | G                 | 0.267 <sup>a</sup> (7.6) <sup>b</sup> | 0.207 (5.5)                  | 0.146 (4.16)                 |
|       | H                 | 0 (0.01)                              | 0.054 (1.73)                 | 0.108 (3.39) <sup>***c</sup> |
|       | R                 | 0.324 (61.81) <sup>d</sup>            | 0.324 (61.77)                | 0.324 (61.8)                 |
| PH    | log $\mathcal{L}$ | 2282                                  | 2268                         | 2285                         |
|       | parameters        | 27                                    | 27                           | 27                           |
|       | AIC               | -4510                                 | -4482                        | -4516                        |
|       | G                 | 1.198 (5.03)                          | 1.766 (6.95)                 | 1.177 (5.02)                 |
|       | H                 | 1.981 (8.36) <sup>****</sup>          | 1.592 (6.95) <sup>****</sup> | 2.051 (8.66) <sup>****</sup> |
|       | R                 | 0.134 (56.23)                         | 0.134 (56.24)                | 0.134 (56.24)                |
| TW    | log $\mathcal{L}$ | 1560                                  | 1555                         | 1567                         |
|       | parameters        | 29                                    | 29                           | 29                           |
|       | AIC               | -3061                                 | -3052                        | -3076                        |
|       | G                 | 0.553 (5.88)                          | 0.659 (6.68)                 | 0.498 (5.57)                 |
|       | H                 | 0.414 (5.04) <sup>****</sup>          | 0.331 (4.06) <sup>***</sup>  | 0.482 (5.85) <sup>****</sup> |
|       | R                 | 0.199 (60.11)                         | 0.199 (60.1)                 | 0.198 (60.13)                |
| HD    | log $\mathcal{L}$ | 6382                                  | 6364                         | 6379                         |
|       | parameters        | 28                                    | 28                           | 28                           |
|       | AIC               | -12709                                | -12673                       | -12702                       |
|       | G                 | 1.51 (6.14)                           | 2.077 (7.82)                 | 1.659 (6.67)                 |
|       | H                 | 1.781 (7.73) <sup>****</sup>          | 1.358 (6.09) <sup>****</sup> | 1.68 (7.36) <sup>****</sup>  |
|       | R                 | 0.053 (58.84)                         | 0.054 (58.78)                | 0.054 (58.81)                |

<sup>a</sup> Variance component estimates reported for additive main effects (G) and epistatic interactions (H) are the ratios of the actual variance component to the residual variance component for ease of comparison.

<sup>b</sup> The variance component divided by their respective standard errors are shown in parentheses.

<sup>c</sup> \*, \*\*, \*\*\*, \*\*\*\* denote p-values of  $p < 0.05$ ,  $p < 0.01$ ,  $p < 0.001$ ,  $p < 10^{-6}$ , respectively for the likelihood ratio test to determine if the epistatic variance component is zero.

<sup>d</sup> The residual variance components, R, are the actual estimates from the centered and scaled data (refer to [Santantonio et al. \(2018\)](#) for scaling coefficients).

**Table S6** Mixed model REML fit summaries of three epistasis models for 4 traits (GY, PH, TW and HD) in the CNLM population based on the  $\{-1, 1\}$  marker parameterization using the POS marker orientation.

| Trait |                    | Homeo                                   | Within                       | Across                       |
|-------|--------------------|-----------------------------------------|------------------------------|------------------------------|
| GY    | $\log \mathcal{L}$ | -48                                     | -41                          | -40                          |
|       | parameters         | 29                                      | 29                           | 29                           |
|       | AIC                | 154                                     | 140                          | 138                          |
|       | G                  | 0.257 <sup>a</sup> (10.31) <sup>b</sup> | 0.191 (7.44)                 | 0.186 (7.32)                 |
|       | H                  | 0.008 (0.75)                            | 0.052 (3.45) <sup>***c</sup> | 0.054 (3.61) <sup>***</sup>  |
|       | R                  | 0.324 (61.7) <sup>d</sup>               | 0.323 (61.64)                | 0.323 (61.64)                |
| PH    | $\log \mathcal{L}$ | 2287                                    | 2323                         | 2326                         |
|       | parameters         | 27                                      | 27                           | 27                           |
|       | AIC                | -4521                                   | -4593                        | -4598                        |
|       | G                  | 2.316 (13.04)                           | 1.507 (9.34)                 | 1.551 (9.59)                 |
|       | H                  | 0.705 (7.3) <sup>****</sup>             | 1.056 (9.85) <sup>****</sup> | 1.036 (9.72) <sup>****</sup> |
|       | R                  | 0.134 (56.29)                           | 0.133 (56.38)                | 0.133 (56.4)                 |
| TW    | $\log \mathcal{L}$ | 1589                                    | 1599                         | 1604                         |
|       | parameters         | 29                                      | 29                           | 29                           |
|       | AIC                | -3120                                   | -3139                        | -3150                        |
|       | G                  | 0.554 (9.49)                            | 0.437 (7.44)                 | 0.395 (7.02)                 |
|       | H                  | 0.282 (7.22) <sup>****</sup>            | 0.354 (8.36) <sup>****</sup> | 0.368 (8.71) <sup>****</sup> |
|       | R                  | 0.198 (60.18)                           | 0.197 (60.2)                 | 0.197 (60.21)                |
| HD    | $\log \mathcal{L}$ | 6379                                    | 6393                         | 6415                         |
|       | parameters         | 28                                      | 28                           | 28                           |
|       | AIC                | -12701                                  | -12730                       | -12774                       |
|       | G                  | 2.547 (13.61)                           | 2.017 (10.81)                | 1.689 (9.94)                 |
|       | H                  | 0.601 (6.43) <sup>****</sup>            | 0.848 (8.04) <sup>****</sup> | 0.982 (9.26) <sup>****</sup> |
|       | R                  | 0.053 (58.83)                           | 0.053 (58.87)                | 0.053 (58.92)                |

<sup>a</sup> Variance component estimates reported for additive main effects (G) and epistatic interactions (H) are the ratios of the actual variance component to the residual variance component for ease of comparison.

<sup>b</sup> The variance component divided by their respective standard errors are shown in parentheses.

<sup>c</sup> \*, \*\*, \*\*\*, \*\*\*\* denote p-values of  $p < 0.05$ ,  $p < 0.01$ ,  $p < 0.001$ ,  $p < 10^{-6}$ , respectively for the likelihood ratio test to determine if the epistatic variance component is zero.

<sup>d</sup> The residual variance components, R, are the actual estimates from the centered and scaled data (refer to [Santantonio et al. \(2018\)](#) for scaling coefficients).

**Table S7** Mixed model REML fit summaries of three epistasis models for 4 traits (GY, PH, TW and HD) in the CNLM population based on the  $\{-1, 1\}$  marker parameterization using the NEG marker orientation.

| Trait |                    | Homeo                                  | Within                        | Across                        |
|-------|--------------------|----------------------------------------|-------------------------------|-------------------------------|
| GY    | $\log \mathcal{L}$ | -46                                    | -38                           | -35                           |
|       | parameters         | 29                                     | 29                            | 29                            |
|       | AIC                | 151                                    | 134                           | 129                           |
|       | G                  | 0.236 <sup>a</sup> (9.44) <sup>b</sup> | 0.181 (7.35)                  | 0.178 (7.35)                  |
|       | H                  | 0.022 (1.86)                           | 0.058 (3.9) <sup>***c</sup>   | 0.06 (4.1) <sup>****</sup>    |
|       | R                  | 0.324 (61.71) <sup>d</sup>             | 0.323 (61.68)                 | 0.322 (61.68)                 |
| PH    | $\log \mathcal{L}$ | 2293                                   | 2336                          | 2342                          |
|       | parameters         | 27                                     | 27                            | 27                            |
|       | AIC                | -4532                                  | -4619                         | -4629                         |
|       | G                  | 2.235 (12.79)                          | 1.428 (9.19)                  | 1.464 (9.46)                  |
|       | H                  | 0.746 (7.52) <sup>****</sup>           | 1.061 (10.06) <sup>****</sup> | 1.038 (10.07) <sup>****</sup> |
|       | R                  | 0.134 (56.3)                           | 0.133 (56.39)                 | 0.133 (56.42)                 |
| TW    | $\log \mathcal{L}$ | 1580                                   | 1605                          | 1601                          |
|       | parameters         | 29                                     | 29                            | 29                            |
|       | AIC                | -3101                                  | -3153                         | -3144                         |
|       | G                  | 0.614 (9.96)                           | 0.373 (6.78)                  | 0.388 (6.71)                  |
|       | H                  | 0.241 (6.4) <sup>****</sup>            | 0.374 (8.94) <sup>****</sup>  | 0.367 (8.59) <sup>****</sup>  |
|       | R                  | 0.199 (60.15)                          | 0.198 (60.22)                 | 0.197 (60.21)                 |
| HD    | $\log \mathcal{L}$ | 6380                                   | 6402                          | 6409                          |
|       | parameters         | 28                                     | 28                            | 28                            |
|       | AIC                | -12704                                 | -12747                        | -12762                        |
|       | G                  | 2.48 (13.41)                           | 1.88 (10.5)                   | 1.753 (10.09)                 |
|       | H                  | 0.626 (6.71) <sup>****</sup>           | 0.895 (8.59) <sup>****</sup>  | 0.95 (9.02) <sup>****</sup>   |
|       | R                  | 0.053 (58.83)                          | 0.053 (58.89)                 | 0.053 (58.9)                  |

<sup>a</sup> Variance component estimates reported for additive main effects (G) and epistatic interactions (H) are the ratios of the actual variance component to the residual variance component for ease of comparison.

<sup>b</sup> The variance component divided by their respective standard errors are shown in parentheses.

<sup>c</sup> \*, \*\*, \*\*\*, \*\*\*\* denote p-values of  $p < 0.05$ ,  $p < 0.01$ ,  $p < 0.001$ ,  $p < 10^{-6}$ , respectively for the likelihood ratio test to determine if the epistatic variance component is zero.

<sup>d</sup> The residual variance components, R, are the actual estimates from the centered and scaled data (refer to [Santantonio et al. \(2018\)](#) for scaling coefficients).



**Table S8** Mixed model REML fit summaries of three epistasis models for 4 traits (GY, PH, TW and HD) in the CNLM population based on the  $\{-1, 1\}$  marker parameterization using the HTEV marker orientation.

| trait |                    | Homeo                                  | Within                        | Across            |
|-------|--------------------|----------------------------------------|-------------------------------|-------------------|
| GY    | $\log \mathcal{L}$ | -46                                    | -34                           | -30               |
|       | parameters         | 29                                     | 29                            | 29                |
|       | AIC                | 151                                    | 127                           | 118               |
|       | G                  | 0.233 <sup>a</sup> (9.23) <sup>b</sup> | 0.165 (6.86)                  | 0.151 (6.45)      |
|       | H                  | 0.025 (1.97)                           | 0.071 (4.56)**** <sup>c</sup> | 0.079 (5)****     |
|       | R                  | 0.323 (61.65) <sup>d</sup>             | 0.322 (61.66)                 | 0.322 (61.67)     |
| PH    | $\log \mathcal{L}$ | 2300                                   | 2355                          | 2357              |
|       | parameters         | 27                                     | 27                            | 27                |
|       | AIC                | -4546                                  | -4655                         | -4659             |
|       | G                  | 2.052 (12.02)                          | 1.101 (7.81)                  | 1.142 (7.99)      |
|       | H                  | 0.84 (8.12)****                        | 1.227 (11.24)****             | 1.209 (11.09)**** |
|       | R                  | 0.133 (56.32)                          | 0.133 (56.43)                 | 0.133 (56.46)     |
| TW    | $\log \mathcal{L}$ | 1599                                   | 1623                          | 1623              |
|       | parameters         | 29                                     | 29                            | 29                |
|       | AIC                | -3140                                  | -3189                         | -3187             |
|       | G                  | 0.476 (8.51)                           | 0.283 (5.73)                  | 0.267 (5.4)       |
|       | H                  | 0.335 (7.92)****                       | 0.435 (10.13)****             | 0.45 (10.15)****  |
|       | R                  | 0.198 (60.2)                           | 0.197 (60.29)                 | 0.197 (60.28)     |
| HD    | $\log \mathcal{L}$ | 6397                                   | 6410                          | 6423              |
|       | parameters         | 28                                     | 28                            | 28                |
|       | AIC                | -12738                                 | -12764                        | -12790            |
|       | G                  | 2.13 (12.27)                           | 1.62 (9.54)                   | 1.395 (8.69)      |
|       | H                  | 0.808 (7.9)****                        | 1.029 (9.43)****              | 1.139 (10.18)**** |
|       | R                  | 0.053 (58.88)                          | 0.053 (58.91)                 | 0.053 (58.94)     |

<sup>a</sup> Variance component estimates reported for additive main effects (G) and epistatic interactions (H) are the ratios of the actual variance component to the residual variance component for ease of comparison.

<sup>b</sup> The variance component divided by their respective standard errors are shown in parentheses.

<sup>c</sup> \*, \*\*, \*\*\*, \*\*\*\* denote p-values of  $p < 0.05$ ,  $p < 0.01$ ,  $p < 0.001$ ,  $p < 10^{-6}$ , respectively for the likelihood ratio test to determine if the epistatic variance component is zero.

<sup>d</sup> The residual variance components, R, are the actual estimates from the centered and scaled data (refer to [Santantonio et al. \(2018\)](#) for scaling coefficients).

**Table S9** Mixed model REML fit summaries of three epistasis models for 4 traits (GY, PH, TW and HD) in the CNLM population based on the  $\{0, 1\}$  marker parameterization using the HTEV marker orientation.

| trait |                   | Homeo                                   | Within                      | Across                      |
|-------|-------------------|-----------------------------------------|-----------------------------|-----------------------------|
| GY    | $\log\mathcal{L}$ | -48                                     | -48                         | -48                         |
|       | parameters        | 29                                      | 29                          | 29                          |
|       | AIC               | 155                                     | 155                         | 155                         |
|       | G                 | 0.268 <sup>a</sup> (12.59) <sup>b</sup> | 0.268 (12.59)               | 0.268 (12.59)               |
|       | H                 | 0                                       | 0                           | 0                           |
|       | R                 | 0.324 (61.86) <sup>c</sup>              | 0.324 (61.86)               | 0.324 (61.86)               |
| PH    | $\log\mathcal{L}$ | 2260                                    | 2246                        | 2248                        |
|       | parameters        | 27                                      | 27                          | 27                          |
|       | AIC               | -4466                                   | -4438                       | -4443                       |
|       | G                 | 1.981 (7.41)                            | 2.84 (9.98)                 | 2.502 (8.49)                |
|       | H                 | 1.423 (6.05) <sup>****d</sup>           | 0.806 (3.68) <sup>***</sup> | 1.081 (4.44) <sup>***</sup> |
|       | R                 | 0.134 (56.2)                            | 0.134 (56.19)               | 0.134 (56.19)               |
| TW    | $\log\mathcal{L}$ | 1552                                    | 1547                        | 1549                        |
|       | parameters        | 29                                      | 29                          | 29                          |
|       | AIC               | -3046                                   | -3036                       | -3041                       |
|       | G                 | 0.746 (7.61)                            | 0.992 (9.51)                | 0.857 (8.24)                |
|       | H                 | 0.264 (3.38) <sup>***</sup>             | 0.064 (0.87)                | 0.183 (2.26) <sup>*</sup>   |
|       | R                 | 0.199 (60.1)                            | 0.199 (60.08)               | 0.199 (60.09)               |
| HD    | $\log\mathcal{L}$ | 6358                                    | 6350                        | 6356                        |
|       | parameters        | 28                                      | 28                          | 28                          |
|       | AIC               | -12660                                  | -12643                      | -12656                      |
|       | G                 | 2.528 (9.24)                            | 2.937 (10.1)                | 2.468 (8.5)                 |
|       | H                 | 1.052 (4.83) <sup>****</sup>            | 0.749 (3.44) <sup>***</sup> | 1.16 (4.78) <sup>****</sup> |
|       | R                 | 0.054 (58.79)                           | 0.054 (58.76)               | 0.054 (58.78)               |

<sup>a</sup> Variance component estimates reported for additive main effects (G) and epistatic interactions (H) are the ratios of the actual variance component to the residual variance component for ease of comparison.

<sup>b</sup> The variance component divided by their respective standard errors are shown in parentheses.

<sup>c</sup> The residual variance components, R, are the actual estimates from the centered and scaled data (refer to [Santantonio et al. \(2018\)](#) for scaling coefficients).

<sup>d</sup> \*, \*\*, \*\*\*, \*\*\*\* denote p-values of  $p < 0.05$ ,  $p < 0.01$ ,  $p < 0.001$ ,  $p < 10^{-6}$ , respectively for the likelihood ratio test to determine if the epistatic variance component is zero.

**Table S10** Prediction accuracies of Homeo, Within and Across genome marker sets for both  $\{-1, 1\}$  and  $\{0, 1\}$  marker coding using POS marker orientation.

| POS | Homeo <sub>-11</sub> | Homeo <sub>01</sub> | Within <sub>-11</sub> | Within <sub>01</sub> | Across <sub>-11</sub> | Across <sub>01</sub> |
|-----|----------------------|---------------------|-----------------------|----------------------|-----------------------|----------------------|
| GY  | 0.599 <sup>a</sup>   | 0.599               | 0.607                 | 0.600                | 0.607                 | 0.599                |
| PH  | 0.583                | 0.573               | 0.607                 | 0.568                | 0.612                 | 0.576                |
| TW  | 0.535                | 0.518               | 0.543                 | 0.514                | 0.547                 | 0.524                |
| HD  | 0.681                | 0.681               | 0.688                 | 0.670                | 0.698                 | 0.671                |

<sup>a</sup> Mean Pearson correlation between predicted and observed genetic values across 10 random 5-fold cross-validation replications.

**Table S11** Prediction accuracies of Homeo, Within and Across genome marker sets for both  $\{-1, 1\}$  and  $\{0, 1\}$  marker coding using NEG marker orientation.

| NEG | Homeo <sub>-11</sub> | Homeo <sub>01</sub> | Within <sub>-11</sub> | Within <sub>01</sub> | Across <sub>-11</sub> | Across <sub>01</sub> |
|-----|----------------------|---------------------|-----------------------|----------------------|-----------------------|----------------------|
| GY  | 0.602 <sup>a</sup>   | 0.599               | 0.612                 | 0.599                | 0.615                 | 0.600                |
| PH  | 0.589                | 0.582               | 0.620                 | 0.565                | 0.615                 | 0.579                |
| TW  | 0.535                | 0.513               | 0.555                 | 0.510                | 0.546                 | 0.519                |
| HD  | 0.676                | 0.671               | 0.698                 | 0.671                | 0.697                 | 0.680                |

<sup>a</sup> Mean Pearson correlation between predicted and observed genetic values across 10 random 5-fold cross-validation replications.

**Table S12** Prediction accuracies of Homeo, Within and Across genome marker sets for both  $\{-1, 1\}$  and  $\{0, 1\}$  marker coding using HTEV marker orientation.

| HTEV | Homeo <sub>-11</sub> | Homeo <sub>01</sub> | Within <sub>-11</sub> | Within <sub>01</sub> | Across <sub>-11</sub> | Across <sub>01</sub> |
|------|----------------------|---------------------|-----------------------|----------------------|-----------------------|----------------------|
| GY   | 0.601 <sup>a</sup>   | 0.601               | 0.616                 | 0.600                | 0.621                 | 0.600                |
| PH   | 0.591                | 0.565               | 0.640                 | 0.557                | 0.633                 | 0.558                |
| TW   | 0.548                | 0.513               | 0.572                 | 0.513                | 0.568                 | 0.513                |
| HD   | 0.688                | 0.669               | 0.700                 | 0.666                | 0.706                 | 0.667                |

<sup>a</sup> Mean Pearson correlation between predicted and observed genetic values across 10 random 5-fold cross-validation replications.

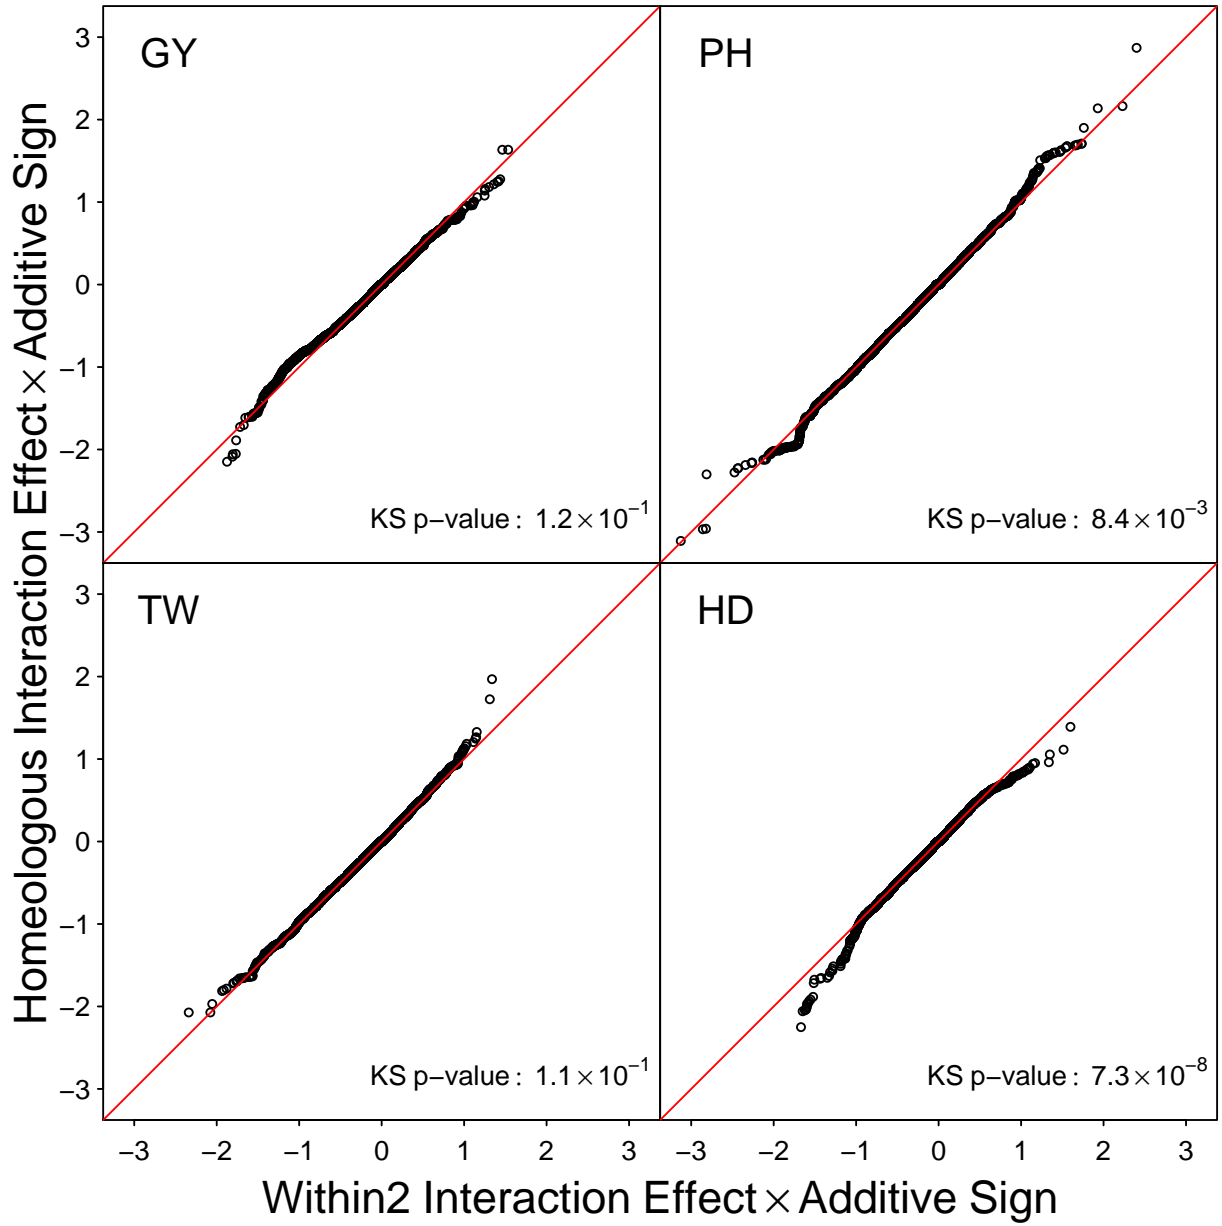

**Figure S11** Quantile quantile plot of the ordered estimated homeologous interaction effects plotted against those from marker sets re-sampled within subgenome chromosomes (Within2) using the LAVHAE . Interaction effects have been multiplied by the effect sign of the corresponding additive effects to emphasize the relationship between the additive and interaction effects.

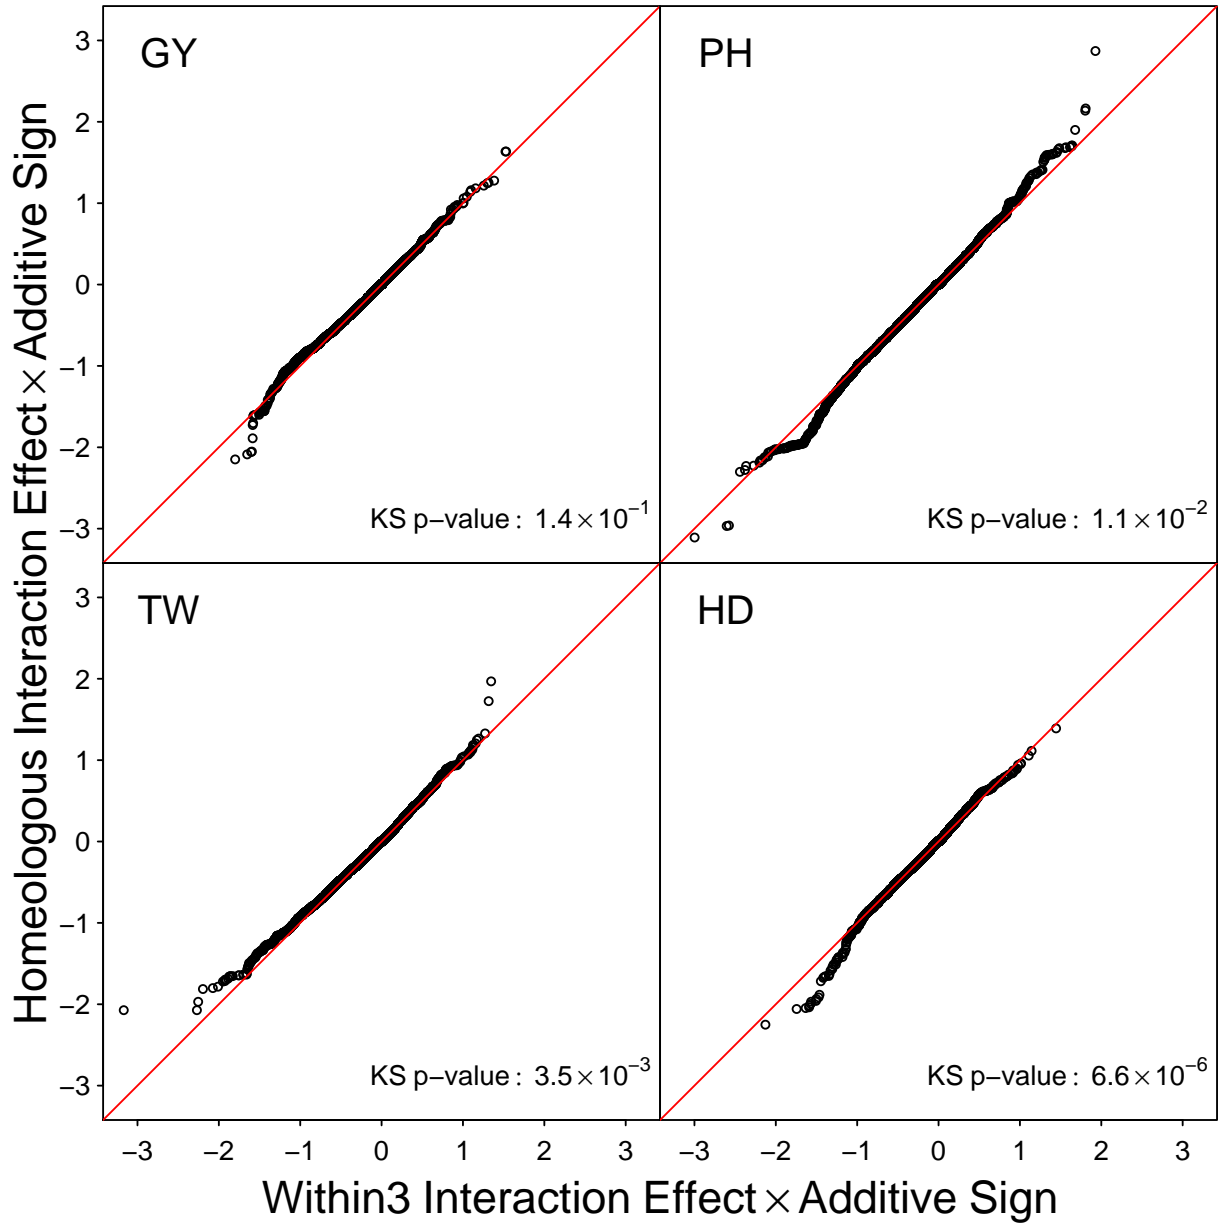

**Figure S12** Quantile quantile plot of the ordered estimated homeologous interaction effects plotted against those from marker sets re-sampled within subgenome chromosomes (Within3) using the LAVHAE . Interaction effects have been multiplied by the effect sign of the corresponding additive effects to emphasize the relationship between the additive and interaction effects.

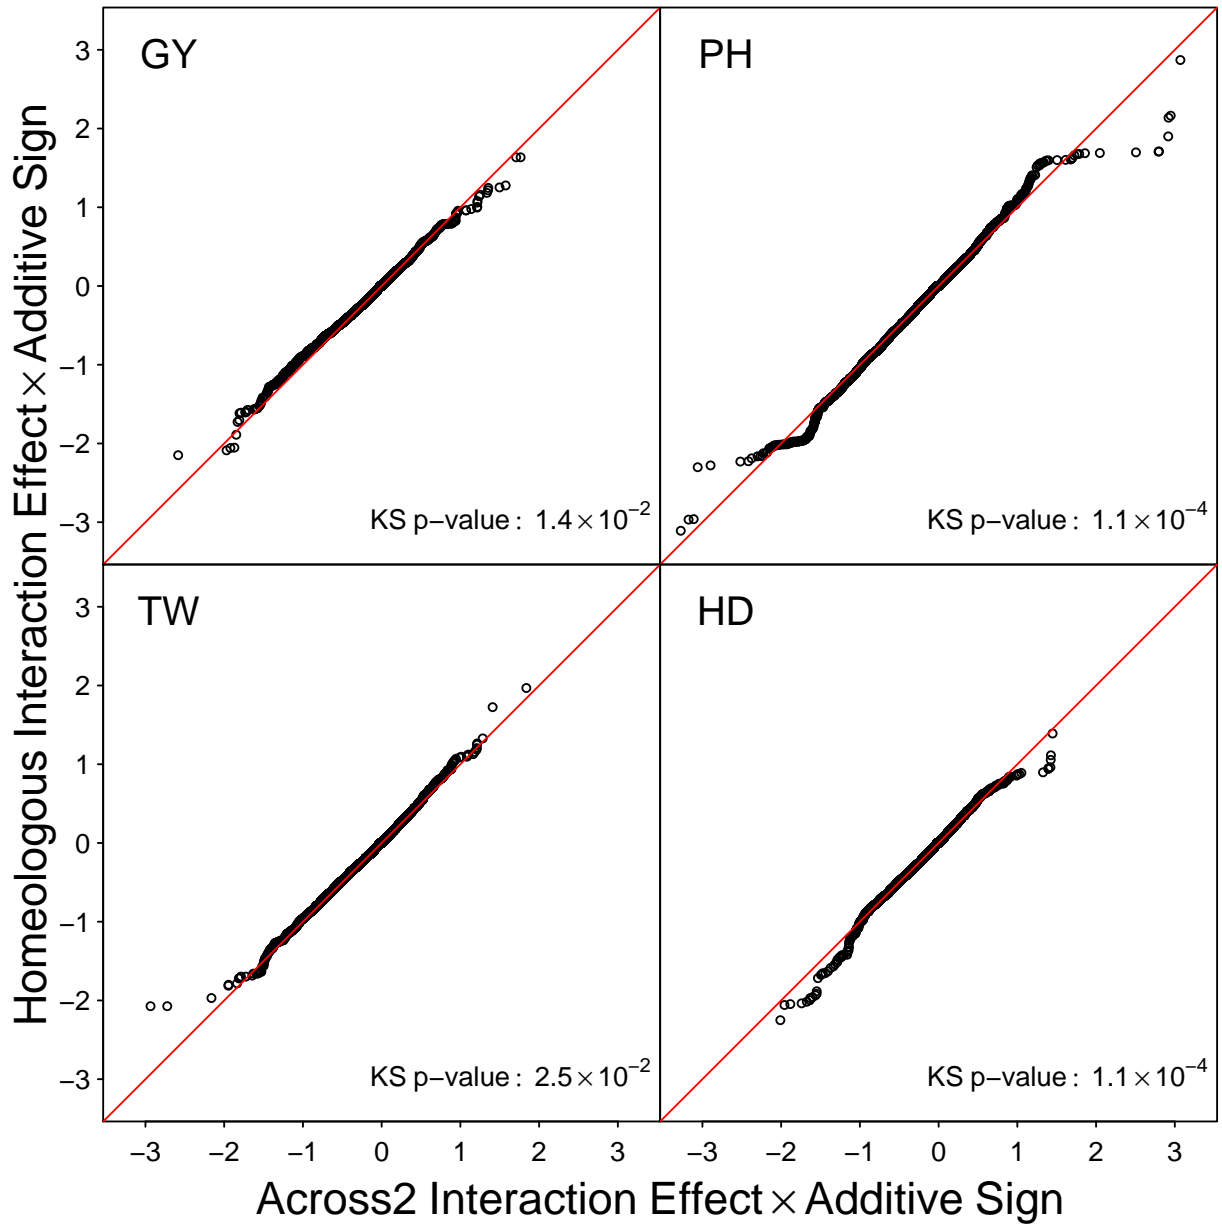

**Figure S13** Quantile quantile plot of the ordered estimated homeologous interaction effects plotted against those from marker sets re-sampled across non-syntenic subgenome chromosomes (Across2) using the LAVHAE marker orientation. Interaction effects have been multiplied by the effect sign of the corresponding additive effects to emphasize the relationship between the additive and interaction effects.

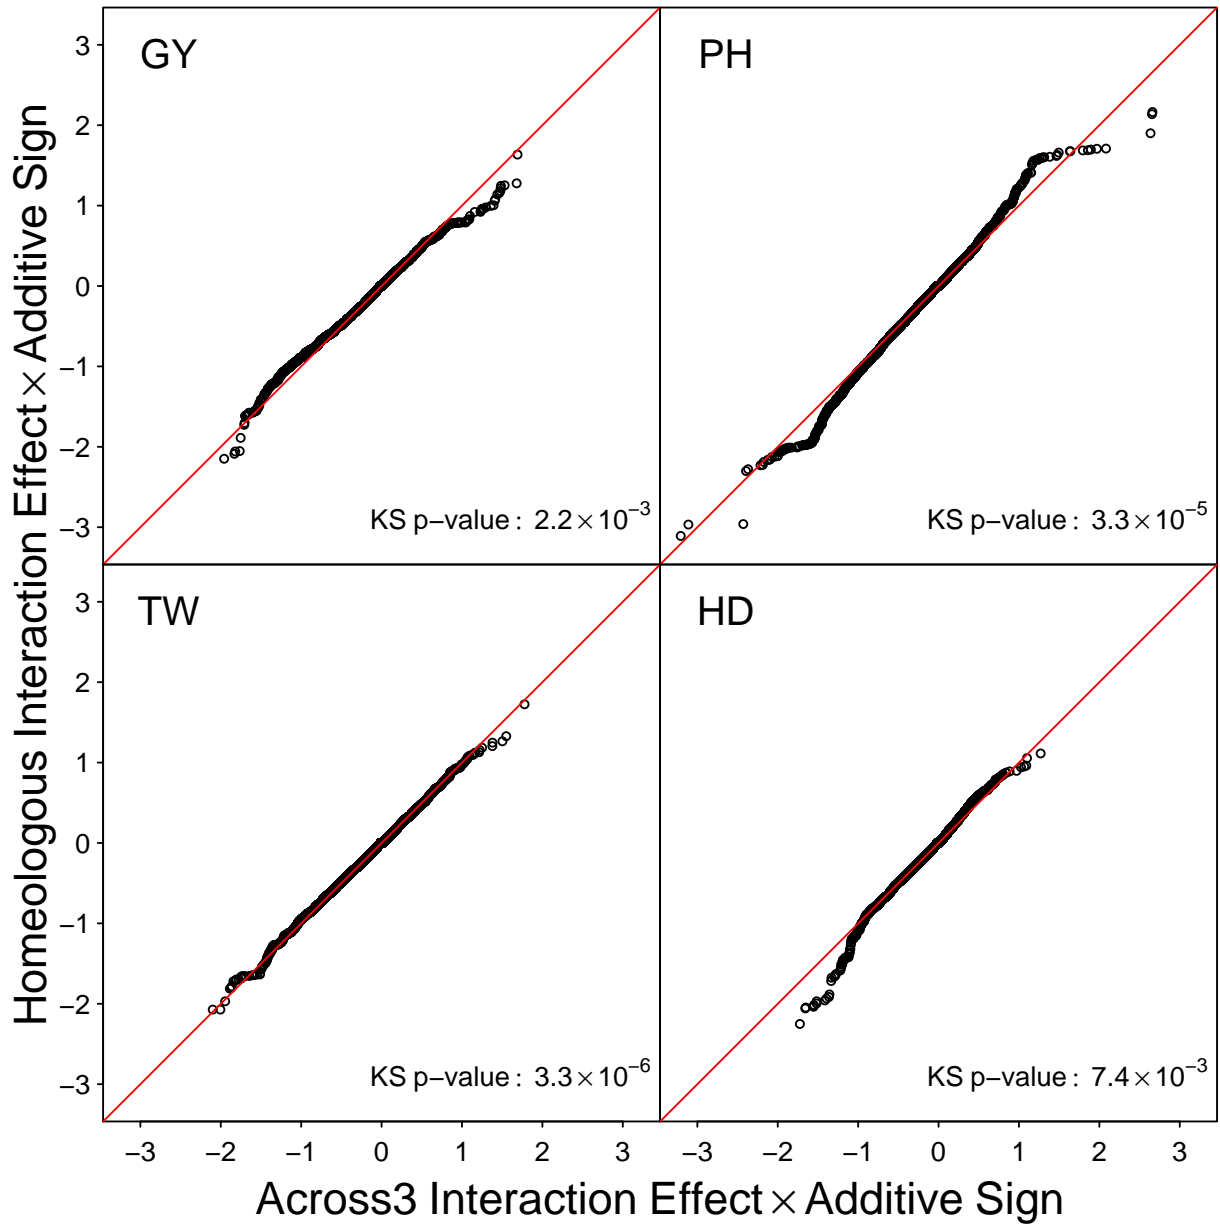

**Figure S14** Quantile quantile plot of the ordered estimated homeologous interaction effects plotted against those from marker sets re-sampled across non-syntenic subgenome chromosomes (Across3) using the LAVHAE marker orientation. Interaction effects have been multiplied by the effect sign of the corresponding additive effects to emphasize the relationship between the additive and interaction effects.

**Table S13** Mixed model REML fit summaries of four epistasis models for 4 traits (GY, PH, TW and HD) in the CNLM population based on the  $\{-1, 1\}$  marker parameterization using the LAVHAE marker orientation using two additional samples of Within (Within2, Within3) and Across (Across2, Across3).

| Trait |                    | Within2                               | Within3           | Across2           | Across3           |
|-------|--------------------|---------------------------------------|-------------------|-------------------|-------------------|
| GY    | $\log \mathcal{L}$ | -32                                   | -29               | -26               | -32               |
|       | parameters         | 29                                    | 29                | 29                | 29                |
|       | AIC                | 122                                   | 115               | 110               | 121               |
|       | G                  | 0.15 <sup>a</sup> (6.29) <sup>b</sup> | 0.14 (6.07)       | 0.134 (5.91)      | 0.154 (6.55)      |
|       | H                  | 0.081 (4.97)**** <sup>c</sup>         | 0.086 (5.32)****  | 0.092 (5.58)****  | 0.078 (4.89)****  |
|       | R                  | 0.322 (61.67) <sup>d</sup>            | 0.322 (61.7)      | 0.321 (61.69)     | 0.322 (61.67)     |
| PH    | $\log \mathcal{L}$ | 2369                                  | 2356              | 2357              | 2359              |
|       | parameters         | 27                                    | 27                | 27                | 27                |
|       | AIC                | -4685                                 | -4658             | -4661             | -4664             |
|       | G                  | 0.979 (7.38)                          | 1.066 (7.57)      | 1.083 (7.67)      | 1.103 (7.86)      |
|       | H                  | 1.257 (11.59)****                     | 1.242 (11.23)**** | 1.253 (11.27)**** | 1.23 (11.27)****  |
|       | R                  | 0.133 (56.45)                         | 0.133 (56.44)     | 0.133 (56.44)     | 0.133 (56.48)     |
| TW    | $\log \mathcal{L}$ | 1647                                  | 1627              | 1641              | 1634              |
|       | parameters         | 29                                    | 29                | 29                | 29                |
|       | AIC                | -3235                                 | -3196             | -3224             | -3210             |
|       | G                  | 0.2 (4.56)                            | 0.267 (5.42)      | 0.213 (4.74)      | 0.233 (5)         |
|       | H                  | 0.479 (10.94)****                     | 0.441 (10.11)**** | 0.48 (10.86)****  | 0.472 (10.67)**** |
|       | R                  | 0.197 (60.38)                         | 0.197 (60.29)     | 0.196 (60.31)     | 0.196 (60.36)     |
| HD    | $\log \mathcal{L}$ | 6455                                  | 6429              | 6442              | 6444              |
|       | parameters         | 28                                    | 28                | 28                | 28                |
|       | AIC                | -12853                                | -12801            | -12828            | -12832            |
|       | G                  | 1.053 (7.75)                          | 1.366 (8.76)      | 1.174 (8.15)      | 1.173 (8.15)      |
|       | H                  | 1.311 (11.68)****                     | 1.15 (10.39)****  | 1.248 (11.19)**** | 1.226 (11.11)**** |
|       | R                  | 0.053 (58.99)                         | 0.053 (58.94)     | 0.053 (58.94)     | 0.053 (58.95)     |

<sup>a</sup> Variance component estimates reported for additive main effects (G) and epistatic interactions (H) are the ratios of the actual variance component to the residual variance component for ease of comparison.

<sup>b</sup> The variance component divided by their respective standard errors are shown in parentheses.

<sup>c</sup> \*, \*\*, \*\*\*, \*\*\*\* denote p-values of  $p < 0.05$ ,  $p < 0.01$ ,  $p < 0.001$ ,  $p < 10^{-6}$ , respectively for the likelihood ratio test to determine if the epistatic variance component is zero.

<sup>d</sup> The residual variance components, R, are the actual estimates from the centered and scaled data (refer to [Santantonio et al. \(2018\)](#) for scaling coefficients).



**Table S14** Mixed model REML fit summaries of four epistasis models for 4 traits (GY, PH, TW and HD) in the CNLM population based on the  $\{0, 1\}$  marker parameterization using the LAVHAE marker orientation using two additional samples of Within (Within2, Within3) and Across (Across2, Across3).

| Trait |                    | Within2                                | Within3                      | Across2                      | Across3                      |
|-------|--------------------|----------------------------------------|------------------------------|------------------------------|------------------------------|
| GY    | $\log \mathcal{L}$ | -47                                    | -48                          | -48                          | -48                          |
|       | parameters         | 29                                     | 29                           | 29                           | 29                           |
|       | AIC                | 153                                    | 155                          | 154                          | 154                          |
|       | G                  | 0.213 <sup>a</sup> (5.66) <sup>b</sup> | 0.25 (6.62)                  | 0.235 (6.47)                 | 0.248 (6.74)                 |
|       | H                  | 0.048 (1.56)                           | 0.015 (0.53)                 | 0.03 (1.06)                  | 0.017 (0.62)                 |
|       | R                  | 0.324 (61.78) <sup>c</sup>             | 0.324 (61.79)                | 0.324 (61.75)                | 0.324 (61.78)                |
| PH    | $\log \mathcal{L}$ | 2268                                   | 2273                         | 2265                         | 2271                         |
|       | parameters         | 27                                     | 27                           | 27                           | 27                           |
|       | AIC                | -4482                                  | -4491                        | -4476                        | -4487                        |
|       | G                  | 1.867 (7.5)                            | 1.656 (6.6)                  | 1.929 (7.38)                 | 1.742 (6.87)                 |
|       | H                  | 1.439 (6.69) <sup>****d</sup>          | 1.682 (7.26) <sup>****</sup> | 1.487 (6.49) <sup>****</sup> | 1.623 (7.04) <sup>****</sup> |
|       | R                  | 0.134 (56.21)                          | 0.134 (56.24)                | 0.134 (56.25)                | 0.134 (56.24)                |
| TW    | $\log \mathcal{L}$ | 1564                                   | 1562                         | 1557                         | 1559                         |
|       | parameters         | 29                                     | 29                           | 29                           | 29                           |
|       | AIC                | -3070                                  | -3067                        | -3057                        | -3059                        |
|       | G                  | 0.49 (5.23)                            | 0.53 (5.62)                  | 0.657 (6.85)                 | 0.589 (6.09)                 |
|       | H                  | 0.492 (5.67) <sup>****</sup>           | 0.464 (5.39) <sup>****</sup> | 0.348 (4.31) <sup>***</sup>  | 0.401 (4.76) <sup>***</sup>  |
|       | R                  | 0.198 (60.13)                          | 0.198 (60.11)                | 0.199 (60.1)                 | 0.199 (60.11)                |
| HD    | $\log \mathcal{L}$ | 6381                                   | 6363                         | 6371                         | 6370                         |
|       | parameters         | 28                                     | 28                           | 28                           | 28                           |
|       | AIC                | -12706                                 | -12669                       | -12686                       | -12684                       |
|       | G                  | 1.364 (5.48)                           | 2.291 (8.48)                 | 1.63 (6.2)                   | 1.994 (7.78)                 |
|       | H                  | 1.932 (8.04) <sup>****</sup>           | 1.194 (5.46) <sup>****</sup> | 1.756 (7.18) <sup>****</sup> | 1.406 (6.42) <sup>****</sup> |
|       | R                  | 0.054 (58.81)                          | 0.054 (58.78)                | 0.054 (58.8)                 | 0.054 (58.78)                |

<sup>a</sup> Variance component estimates reported for additive main effects (G) and epistatic interactions (H) are the ratios of the actual variance component to the residual variance component for ease of comparison.

<sup>b</sup> The variance component divided by their respective standard errors are shown in parentheses.

<sup>c</sup> The residual variance components, R, are the actual estimates from the centered and scaled data (refer to [Santantonio et al. \(2018\)](#) for scaling coefficients).

<sup>d</sup> \*, \*\*, \*\*\*, \*\*\*\* denote p-values of  $p < 0.05$ ,  $p < 0.01$ ,  $p < 0.001$ ,  $p < 10^{-6}$ , respectively for the likelihood ratio test to determine if the epistatic variance component is zero.

**Table S15** Prediction accuracies of two additional samples of Within (Within2, Within3) and Across (Across2, Across3) genome marker sets, for both  $\{-1, 1\}$  and  $\{0, 1\}$  marker coding using LAVHAE marker orientation.

| LAVHAE | Within2 <sub>01</sub> | Within3 <sub>01</sub> | Across2 <sub>01</sub> | Across3 <sub>01</sub> | Within2 <sub>-11</sub> | Within3 <sub>-11</sub> | Across2 <sub>-11</sub> | Across3 <sub>-11</sub> |
|--------|-----------------------|-----------------------|-----------------------|-----------------------|------------------------|------------------------|------------------------|------------------------|
| GY     | 0.600                 | 0.599                 | 0.600                 | 0.600                 | 0.620                  | 0.624                  | 0.623                  | 0.618                  |
| PH     | 0.573                 | 0.569                 | 0.566                 | 0.570                 | 0.655                  | 0.640                  | 0.634                  | 0.644                  |
| TW     | 0.522                 | 0.524                 | 0.518                 | 0.518                 | 0.604                  | 0.581                  | 0.592                  | 0.585                  |
| HD     | 0.683                 | 0.673                 | 0.676                 | 0.679                 | 0.727                  | 0.715                  | 0.718                  | 0.724                  |
